1 **In vivo genome-wide CRISPR screens identify SOCS1 as a major intrinsic**  
2 **checkpoint of CD4<sup>+</sup> Th1 cell response**

3 Aurélien Sutra Del Galy <sup>1\*</sup>, Silvia Menegatti <sup>2\*</sup>, Jaime Fuentealba <sup>2</sup>, Laetitia Perrin <sup>2</sup>, Francesca  
4 Lucibello <sup>2</sup>, Julie Helft <sup>2</sup>, Aurélie Darbois <sup>2</sup>, Michael Saitakis <sup>2</sup>, Jimena Tosello <sup>2</sup>, Derek  
5 Rookhuizen <sup>2</sup>, Marc Deloger <sup>3</sup>, Pierre Gestraud <sup>4</sup>, Gérard Socié <sup>1</sup>, Sebastian Amigorena <sup>2</sup>,  
6 Olivier Lantz # <sup>2,5,6</sup> and Laurie Menger <sup>2#§</sup>

7 **Affiliations :**

- 8  
9 1) AP-HP Hospital Saint Louis, Hematology/Transplantation, Paris, 75010, France.  
10 2) INSERM U932, PSL University, Institut Curie, Paris, 75005, France.  
11 3) INSERM US23, CNRS UMS 3655, Gustave Roussy Cancer Campus, 94800 Villejuif, France.  
12 4) Bioinformatics and Computational Systems Biology of Cancer, PSL Research University, Mines  
13 Paris Tech, INSERM U900, 75005 Paris, France.  
14 5) Laboratoire d'immunologie clinique, Institut Curie, Paris, 75005, France.  
15 6) Centre d'investigation Clinique en Biothérapie Gustave-Roussy Institut Curie (CIC-BT1428)  
16 Institut Curie, Paris, 75005, France.

17  
18 Correspondence to:

19 # Laurie Menger: Laboratoire d'Immunologie and Inserm U932, Institut Curie, 26 rue d'Ulm, 75005  
20 Paris, France. Phone: +33 156246535 Email: laurie.menger@curie.fr

21 # Olivier Lantz: Laboratoire d'Immunologie and Inserm U932, Institut Curie, 26 rue d'Ulm, 75005  
22 Paris, France. Phone: +33 144324218 Email: Olivier.lantz@curie.fr

23 \* Contributed equally

24 § Lead contact

25

26

27

28

29

30

31

32

33

## 34 **Summary**

35           The expansion of antigen experienced CD4<sup>+</sup> T cells is limited by intrinsic factors. Using *in vivo*  
36 genome-wide CRISPR-Cas9 screens, we identified SOCS1 as a non-redundant checkpoint imposing a  
37 brake on CD4<sup>+</sup> T-cell proliferation upon rechallenge. We show here that SOCS1 is a critical node  
38 integrating both IL-2 and IFN- $\gamma$  signals and blocking multiple signaling pathways to abrogate CD4<sup>+</sup> Th1  
39 cell response. In CD8<sup>+</sup> T-cell, SOCS1 does not impact the proliferation but rather reduces survival and  
40 effector functions. By targeting SOCS1, both murine and human CD4<sup>+</sup> T-cell antitumor adoptive  
41 therapies exhibit a restored intra-tumor accumulation, proliferation/survival, persistence and  
42 polyfunctionality, promoting long term rejection of established tumors. These findings identify SOCS1  
43 as a major intracellular checkpoint inhibitor of primed CD4<sup>+</sup> T cells, opening new possibilities to  
44 optimize CAR-T cell therapies composition and efficacy.

45

## 46 **Keywords:**

47 *In vivo* CRISPR screen, primary CD4<sup>+</sup> T cell, SOCS1, T cell expansion, T cell cytotoxicity,  
48 immunotherapy, adoptive cell transfer, human CAR-T cells

49

## 50 **Introduction**

51           Adoptive T cell therapy (ATCT) including T cells engineered with recombinant T Cell Receptor  
52 (TCR), Chimeric Antigen Receptor (CAR) or tumor-infiltrating lymphocytes (TILs) has become a  
53 powerful anti-cancer therapy. The *in vitro* manufacturing process enables to genetically reprogram a  
54 heterogenous mixture of CD4<sup>+</sup> and CD8<sup>+</sup> T-cell live drug to improve proliferation, survival and effector  
55 functions (Lim and June, 2017). Although CD8<sup>+</sup> or CD4<sup>+</sup> T cells alone can exert significant therapeutic  
56 effects (Adusumilli et al., 2014; Brentjens et al., 2003), the co-injection of both subsets is crucial for  
57 optimal and sustained antitumor activity (Borst et al., 2018; Linnemann et al., 2011; Sadelain, 2015).  
58 Exhibiting pleiotropic effects, CD4<sup>+</sup> T cells can boost antitumor immune responses through both helper  
59 (Bos and Sherman, 2010; Corthay et al., 2005; Zhu et al., 2015) and cytotoxic functions (Kitano et al.,  
60 2013; Quezada et al., 2010; Śledzińska et al., 2020; Xie et al., 2010). However, after *in vitro* activation  
61 and adoptive transfer CD4<sup>+</sup> and CD8<sup>+</sup> T cells differ in their capacity to proliferate and persist *in vivo*

62 (Turtle et al., 2016; Yang et al., 2017a). Hence, while CD8<sup>+</sup> T cells undergo extensive and autonomous  
63 clonal expansion, CD4<sup>+</sup> T cells need repeated antigen stimulation and rapidly stop to proliferate, leading  
64 to approximately 10-20 fold less expansion (Foulds et al., 2002; Homann et al., 2001; Ravkov and  
65 Williams, 2009; Seder and Ahmed, 2003). The differences in the magnitude and duration of their  
66 expansion are not due to external signals nor competition for resources (Homann et al., 2001; Seder and  
67 Ahmed, 2003). Instead, several studies reported that antigen experienced (Ag-exp) CD4<sup>+</sup> T cells,  
68 including activated, effector and memory CD4<sup>+</sup> T cells specifically curtail their own proliferation  
69 (Foulds et al., 2002; Helft et al., 2008; MacLeod et al., 2010; Merica et al., 2000). In the context of  
70 ATCT, as small doses of T cells are infused into patients, Ag-exp CD4<sup>+</sup> T cells can become a limiting  
71 subset compromising an efficient protective immune response (Homann et al., 2001).

72 Using TCR-Transgenic (Tg) CD4<sup>+</sup> T cells, we previously developed an *in vivo* system modeling  
73 a localized and asynchronous immune response, where new and returning T cells continuously enter the  
74 draining lymph node (Helft et al., 2008). We evidenced a preferential exclusion of Ag-experienced CD4<sup>+</sup>  
75 T cells from an ongoing immune response. This inhibition is Ag specific, begins at day 2 (long before  
76 Ag disappearance) and is neither due to extrinsic factors, such as regulatory T cells (Tregs), lack of  
77 antigen presenting cell (APCs) education nor competition for Ag (Helft et al., 2008). Instead, Ag-  
78 experienced CD4<sup>+</sup> T cells are stopped by an active and dominant phenomenon, which cannot be  
79 overcome by providing new Ag-loaded DCs. In this model, generalizable to several TCR-Tg CD4<sup>+</sup> T  
80 cells, the expansion of Ag-exp CD4<sup>+</sup> T cells is abolished while naive CD4<sup>+</sup> T cells proliferation is  
81 maintained during the immune response. This strong, reproducible and intrinsic inhibition of Ag-exp  
82 CD4<sup>+</sup> T cell proliferation allows for an *in vivo* efficient selective pressure of proliferative T cells after  
83 genetic modifications.

84 Using an *in vivo* genome-wide CRISPR-Cas9 positive screen, we interrogated in a systematic  
85 and unbiased manner the genes that restore the abrogated proliferation of Ag-exp Cas9 CD4<sup>+</sup> T cells.  
86 Our screen identifies Suppressor of Cytokine Signaling 1 (SOCS1) as a non-redundant and intrinsic  
87 inhibitor of CD4<sup>+</sup> T-cell proliferation and survival. In addition, we demonstrate that SOCS1 is a critical  
88 node, integrating cytokines signals (IFN- $\gamma$  and IL-2) to actively limit CD4<sup>+</sup> T cell functions. We  
89 investigated the function of SOCS1 in both mouse and human CD4<sup>+</sup> and CD8<sup>+</sup> antitumor adoptive cell

90 therapies. SOCS1 inactivation restored CD4<sup>+</sup> T-cell expansion, as well as helper and cytotoxic functions  
91 whereas it greatly boosted CD8<sup>+</sup> T cell cytotoxic potential.

## 92 **Results**

### 93 ***In vivo* genome-wide screen identified SOCS1 as a major non-redundant inhibitor of antigen** 94 **experienced CD4<sup>+</sup> T-cell expansion**

95 To unravel the inhibitory mechanisms controlling the proliferation of Ag-exp CD4<sup>+</sup> T-cell, we  
96 used the A<sup>b</sup>:Dby-specific Marilyn monoclonal CD4<sup>+</sup> T cells (from the TCR-Tg *Rag2*<sup>-/-</sup> Marilyn mouse  
97 (Lantz et al., 2000)). After intravenous (i.v.) adoptive transfer of naive CD45.2 Marilyn CD4<sup>+</sup> T cells  
98 into C57BL/6 hosts, we initiated an immune response by injecting Dby peptide-loaded dendritic cells  
99 (DCs) into the footpad (**Fig. 1A**). To track the fate of newly recruited Ag-specific CD4<sup>+</sup> T cells into  
100 such an ongoing immune response, we let the first cohort of primed Marilyn cells expand for a week.  
101 Then, by injecting i.v. a second cohort of naive or Ag-exp CD45.1 Marilyn CD4<sup>+</sup> T cells (both effector  
102 and memory cells, generated *in vivo*), we previously demonstrated that the proliferation of Ag-exp CD4<sup>+</sup>  
103 Marilyn T cells is strongly inhibited during an ongoing immune response while naive T cells are able to  
104 expand efficiently (Helft et al., 2008).

105 In this monoclonal recall response, we first reproduced the robust functional inhibition of Ag-  
106 exp CD45.1 Marilyn CD4<sup>+</sup> T cells, generated *in vitro* by priming lymph nodes and splenocytes with  
107 Dby peptide, IL-2 and IL-7 and resting for 6-10 days (**Fig. 1B-D, Fig. S1A, B**). This model opens up  
108 the possibility to genetically manipulate Ag-exp CD4<sup>+</sup> T cells before analyzing their fate *in vivo* during  
109 an immune response. To identify the intrinsic negative regulators of the CD4<sup>+</sup> T cell immune response,  
110 we performed a positive genome-wide CRISPR screen looking for genes whose inactivation would  
111 restore the proliferation of Ag-exp CD4<sup>+</sup> T cells during an immune response. We transduced *in vitro*-  
112 generated Ag-exp Marilyn-R26-Cas9 (Cas9) T cells (**Fig. S1B**) with a genome-wide knockout (GWKO)  
113 sgRNA lentiviral library (18400 genes, 90K sgRNA)(Tzelepis et al., 2016), achieving 20-25%  
114 efficiency (BFP<sup>+</sup>) (**Fig. 1E**). After puromycin selection, 40% of the transduced T cells survived,  
115 revealing a 75% single infection rate (Chen et al., 2015) (**Fig. S1C**). Prior injection into the adoptive  
116 hosts, resting mock and library-transduced Ag-exp Marilyn-Cas9 T cells exhibited a central memory  
117 phenotype (CD62L<sup>+</sup>CD44<sup>+</sup>), allowing them to similarly home to the dLN (**Fig.1E**). Analysis of sgRNA

118 in the transduced Marilyn-Cas9 T cells revealed that less than 0.5% of the sgRNA were under-  
119 represented as compared to the original plasmid library (**Fig. 1F, Fig. S1D, E**). Consistent with the  
120 coverage of sgRNAs *in vivo*, we conducted two independent GWKO pooled screens ( $n=10$  mice) by  
121 injecting  $12 \cdot 10^6$  Ag-exp library-transduced or  $12 \cdot 10^6$  mock-transduced Marilyn-Cas9 T cells per  
122 C57BL/6 mouse as a second cohort ( $>130$  Marilyn cells/gRNA/mouse with 5 different gRNA/gene e.g  
123  $>600$  Marilyn cells/mouse with a mutated gene) (**Fig. 1A**). Seven days after transfer and priming, mock-  
124 transduced Marilyn-Cas9 cells proliferation was abolished. However, the proliferation of the library-  
125 transduced Marilyn-Cas9 cells in the presence of the first cohort (strong *in vivo* selection) was  
126 significantly restored, as shown by the higher ratio of BFP<sup>+</sup>/BFP<sup>-</sup> in the CFSE<sup>lo</sup> subset compared to  
127 mock-transduced Marilyn-Cas9 cells ratio, indicating the release of the proliferative blockade by some  
128 sgRNA (**Fig. 1G**). Without the first cohort, library-transduced Marilyn cells expanded to some extent,  
129 attesting for an efficient priming (**Fig. 1G**). After CFSE-based cell sorting of CD45.1 Marilyn-Cas9 T  
130 cells (**Fig. S1F**), amplified sgRNA sequences enriched in the CFSE<sup>lo</sup> subset were compared to sgRNA  
131 from non-dividing T cells (CFSE<sup>hi</sup>). The small fraction of sgRNA represented in the CFSE<sup>lo</sup> subset attest  
132 the effectiveness of the *in vivo* selection (**Fig. S1G**). Analysis of individual sgRNA enriched in the  
133 CFSE<sup>lo</sup> subset of two independent screens from the strong *in vivo* selection identified *Socs1* as the  
134 major gene involved in the restored proliferation of Ag-exp CD4<sup>+</sup> T cells *in vivo* ( $p < 1 \cdot 10^{-6}$ , false  
135 discovery rate (FDR)  $< 1\%$ ) (**Fig. 1H**), while other lower ranking targets presented a FDR  $> 0.5$ .  
136 Interestingly, *Socs1* sgRNA were also significantly enriched in the CFSE<sup>lo</sup> subset of library-transduced  
137 Marilyn cells injected compared to the CFSE<sup>hi</sup> subset (weak *in vivo* selection), consistent with the  
138 capacity of Ag-exp CD4<sup>+</sup> T cells to inhibit one another (**Fig. S1H**). Altogether these data support a non-  
139 redundant and critical role for SOCS1 in T cell biology, in particular for CD4<sup>+</sup> T cells that had not yet  
140 been explored.

141 We next assessed the impact of SOCS1 inactivation on Ag-exp CD4<sup>+</sup> T-cell proliferation using  
142 electroporation of individual sgRNA Cas9 ribonucleoprotein complexes (RNPs) (Seki and Rutz, 2018)  
143 in two different CD4<sup>+</sup> TCR-Tg models, Marilyn, and OT2 cells (the latter expresses a TCR specific for  
144 MHC-II restricted ovalbumin peptide). Briefly, *in vitro* primed CD4<sup>+</sup> TCR-Tg cells were electroporated  
145 with RNPs, comprising a sgRNA targeting a different sequence in *Socs1* gene than those from the

146 GWKO library.  $10^6$  naïve,  $2 \cdot 10^6$  Ag-exp mock or  $2 \cdot 10^6$  Ag-exp sgSOCS1 CD4<sup>+</sup> T cells (based on CD62L  
147 positivity) (**Fig. S1 B, I, J**) were CFSE-labeled and subsequently injected as secondary responders into  
148 C57BL/6 mice during an ongoing immune response. In both models, the large naïve CD4<sup>+</sup> T cell  
149 expansion indicated efficient priming whereas *Socs1* gene inactivation unleashed the brake observed in  
150 mock Ag-exp CD4<sup>+</sup> T cells proliferation (**Fig. 1I, Fig.S1K**). These results uncover a role for SOCS1 as  
151 a major intrinsic regulator responsible for Ag-exp CD4<sup>+</sup> T cell arrest during an ongoing immune  
152 response. Notably, we did not observe any Treg conversion after Marilyn and OT2 cells transfer *in vivo*  
153 (**Fig. S1L**), suggesting that Ag-specific Tregs are not involved in our models, contrary to what was  
154 suggested in another report (Akkaya et al., 2019).

### 155 **SOCS1 is a critical node integrating multiple cytokine signals to actively inhibit CD4<sup>+</sup> T cell** 156 **functions**

157 To mechanistically characterize SOCS1-mediated inhibition of CD4<sup>+</sup> T cells, we sought for  
158 potential inducers and subsequently assessed the functional consequences of *Socs1* inactivation on Ag-  
159 exp CD4<sup>+</sup> T cells. SOCS1 expression in murine splenocytes and CD4 T cells is induced by both  
160 cytokines and TCR stimulation with different timelines and intensities (Sukka-Ganesh and Larkin,  
161 2016a). Although basal levels of SOCS1 are present in untreated T cells, increase in SOCS1 protein  
162 level in response to cytokine stimulation arises rapidly (6 hours) while its maximal expression occurs  
163 48h after TCR stimulation (Egwuagu et al., 2002; Sukka-Ganesh and Larkin, 2016b). This is in  
164 accordance with the timeframe of inhibition in our model, which starts *in vivo* 2 days after priming  
165 (Helft et al., 2008). These results suggest that TCR engagement could be the reason for SOCS1 induction  
166 in Ag-exp CD4<sup>+</sup> T cells. To assess if a differential sensitivity to cytokine signaling could explain the  
167 selective inhibitory activity between naïve and antigen experienced cells, we compared the  
168 transcriptional expression of cytokine receptors between sorted proliferating (green) and inhibited  
169 subsets (red) during an ongoing immune response, at day 14 (**Fig. 2A**). We observed a significantly  
170 increased expression of *Il2ra* (also called CD25, confirmed at protein level, **Fig. S2A**), *Ifngr1* and *Ifngr2*  
171 in the CFSE<sup>hi</sup> cells as compared to CFSE<sup>lo</sup> cells (**Fig. 2B**). Moreover, naïve and Ag-exp CD4<sup>+</sup> T cells  
172 secreted IL-2, while only Ag-exp Marilyn CD4<sup>+</sup> T cells produced both IL-2 and IFN- $\gamma$  (**Fig. S2B**). As  
173 SOCS1 is a known regulator of IFN- $\gamma$  signaling (Alexander et al., 1999), we evaluated the proliferation

174 of Ag-exp IFN- $\gamma$ R<sup>-/-</sup> Marilyn cells during an ongoing immune response, but the absence of the receptor  
175 marginally restored the expansion of these cells *in vivo* (**Fig. 2C**). SOCS1 can also be induced by IL-2  
176 in T cells and associates with IL-2R $\beta$  (Liau et al., 2018) to potently inhibit IL-2-induced Stat5 function  
177 (Sporri et al., 2001). Using blocking antibodies concomitant with Ag re-stimulation of Ag-exp Marilyn  
178 CD4<sup>+</sup> T cells *in vivo*, we then assessed the roles of IL-2 and IFN- $\gamma$  alone and in combination in this  
179 inhibition. The blockade of IL-2 signaling using anti-mouse IL-2R $\beta$ , which inhibits binding of IL-2 to  
180 the IL-2R did not reverse Ag-exp CD4<sup>+</sup> T cells impaired proliferation (**Fig. 2D**). However, blockade of  
181 both IL-2 and IFN- $\gamma$  signaling (using anti-IFN- $\gamma$ R $\alpha$  and Ag-exp IFN $\gamma$ -R<sup>-/-</sup> Marilyn T, **Fig. S2C**)  
182 significantly rescued the expansion of re-stimulated Ag-exp Marilyn T cells (**Fig. 2D**). This shows a  
183 redundancy between the two cytokine receptors upstream of SOCS1 to impair Ag-exp CD4<sup>+</sup> T cells  
184 expansion.

185         Then, we estimated the functional consequence of *Socs1* deletion on Ag-exp CD4<sup>+</sup> T cells TCR-  
186 induced activation, reflected by expression of the early activation marker CD69, the late activation  
187 marker CD25 and the T cell receptor responsive transcription factor Interferon Regulatory Factor 4  
188 (IRF4) (**Fig. 2E, Fig. S2D, E**). After overnight stimulation with titrated peptide-pulsed DCs, both Ag-  
189 exp *Socs1*-inactivated Marilyn and OT2 cells displayed similar sensitivity (Ag dose leading to 50% of  
190 the maximum response) to Ag stimulation as compared to mock-treated cells. However, we observed a  
191 striking increase in CD25 and IRF4 expressions at higher Ag doses with an elevated "plateau" (**Fig. 2E,**  
192 **Fig. S2D, E**). This suggests that SOCS1 does not directly regulate proximal signals induced by cognate  
193 peptide stimulation but rather inhibits downstream signaling events. This would suggest the release of a  
194 negative feedback loop, related to the secretion of IL-2 and IFN- $\gamma$  in the medium. As IRF4 is the  
195 central regulator of Th1 cytokines secretion in CD4<sup>+</sup> T cells (Mahnke et al., 2016; Wu et al., 2017), we  
196 evaluated the capacity of *Socs1* inactivated CD4<sup>+</sup> T cells to display polyfunctionality. *Socs1* inactivated  
197 Marilyn and OT2 cells exhibited higher percentage of Th1 polycytokine (IFN- $\gamma$ -, TNF $\alpha$ - and IL-2-)  
198 production after re-stimulation (**Fig. 2F, S2F**). Thus, by integrating several cytokine signals, SOCS1  
199 actively hampers polyfunctionality of Ag-exp CD4<sup>+</sup> T cells. Our findings show that SOCS1 is a node



200 capable of receiving signals from several inputs (IFN- $\gamma$  and IL2) to abrogate multiple signaling outputs,  
201 leading to blockade of proliferative and effector functions.

## 202 ***Socs1*-inactivation improves the intrinsic and extrinsic antitumor effect of adoptively transferred** 203 **CD4<sup>+</sup> T cells**

204 The restored functionalities of *Socs1* inactivated CD4<sup>+</sup> T cells led us to evaluate the direct and  
205 indirect therapeutic potential of *Socs1* deletion on adoptively transferred antitumor CD4<sup>+</sup> T cells. We  
206 challenged female C57BL/6 mice with the Dby-expressing MB49 male bladder carcinoma cells and 10  
207 days later intravenously transferred mock or sgSOCS1 antigen experienced Marilyn cells (**Fig. 3A**). In  
208 the absence of Marilyn cell transfer, the immunogenic but nevertheless aggressive MB49 tumors grew  
209 unimpeded by the endogenous immune response (**Fig. 3B**). The transfer of mock Ag-exp Marilyn cells  
210 led to rejection of MB49 tumors in 4 out of 11 mice, while the transfer of Ag-exp sgSOCS1 Marilyn  
211 CD4<sup>+</sup> T cells induced tumor rejection in 9 out of 11 mice (**Fig. 3B, C**). To determine the mechanisms  
212 of this protection, we analyzed the number, phenotype and transcriptome of the transferred Marilyn T  
213 cells in the tumor, in the tumor draining lymph node (TdLN) and in a distant irrelevant LN (irr-LN).  
214 Seven days after transfer, the number of Ag-exp sgSOCS1 Marilyn cells was much higher in the tumor  
215 and TdLN as compared to mock Marilyn cells (**Fig. 3D**). This was associated with a higher percentage  
216 of proliferating Ag-exp sgSOCS1 Marilyn cells in TdLN-infiltrating as compared to mock Marilyn cells,  
217 which displayed dominant arrest in their proliferation (**Fig. 3E**). In addition to enhanced proliferation or  
218 survival of CD4<sup>+</sup> T cells, bulk RNAseq analysis of Marilyn cells sorted from TdLN at day 7 showed  
219 that *Socs1* deletion increased the expression of cytokine receptors, *Il12rb2*, and *Il2rb*, effector molecule  
220 such as *Tbx21*, activation markers *Cxcr3* (Rabin et al., 2003), *Icos* and anti-apoptotic genes, such as  
221 *Hopx* (Albrecht et al., 2010) and *Pifl* (Gagou et al., 2011) (**Fig. S3A**). Hallmarks analysis revealed that  
222 several pathways were significantly upregulated in sgSOCS1 TdLN infiltrating cells ( $FDR < 0.05$ ).  
223 They include genes implicated in cell cycle and DNA replication (G2M checkpoints, E2F transcription  
224 factors, mitotic spindle) as well as IL2/STAT5 signaling (**Fig. 3F**). This mirrors the higher persistence  
225 of Ag-exp sgSOCS1 Marilyn cells as compared to mock Ag-exp Marilyn in the blood of tumor  
226 challenged mice, 25 days after transfer (**Fig. S3B**). Analysis at the protein level of Ag-exp sgSOCS1  
227 Marilyn T cells in the TdLN and in the tumor confirmed our bulk RNA-seq analysis with preserved



228 expression of Th1 cytokines and cytotoxic molecules (Granzyme B) (**Fig. 3G, H, Fig. S3C**). However,  
229 the absence of infiltrating mock Marilyn T cells does not allow us to evaluate if *Socs1* inactivation  
230 increase GzmB expression or rather increased the survival of sgSOCS1 Marilyn T cells with a preserved  
231 GzmB expression. Consistent with this functional analysis, major differences emerged in transcriptomic  
232 profiles related to T cell function and differentiation. Gene set enrichment analysis (GSEA) revealed  
233 downregulation of naive-associated genes and enrichment of T conventional marker (Tconv) as  
234 compared to Treg-related genes in Marilyn sgSOCS1 cells (**Fig. S3D**).

235 Importantly, the number of activated host polyclonal CD8<sup>+</sup> T cells and NK cells in the tumor  
236 was increased by 2-3-fold in MB49-bearing mice transferred with sgSOCS1 CD4<sup>+</sup> Marilyn cells, at day  
237 7 (**Fig S3. E**). As estimated by *ex vivo* IFN- $\gamma$  or GZMB expressions, the transfer of Ag-exp sgSOCS1  
238 Marilyn T cells lead to increased number of functional effector cells at the tumor site (**Fig. 3I, J, Fig.**  
239 **S3E**). Thus, *Socs1* deletion in CD4<sup>+</sup> T cells improved the anti-tumor response through both extrinsic  
240 and intrinsic mechanisms with enhanced CD4<sup>+</sup> T cell expansion, function and persistence as well as  
241 increased magnitude of the endogenous anti-tumor immune response.

#### 242 **Differential effect of *Socs1*-inactivation on the properties of CD4<sup>+</sup> and CD8<sup>+</sup> T cells used for** 243 **adoptive transfer against melanoma tumors**

244 To compare the biological impact of *Socs1* deletion in CD4<sup>+</sup> and/or CD8<sup>+</sup> T cells on anti-tumor  
245 response, we independently generated *in vitro* activated tumor specific CD4<sup>+</sup> and CD8<sup>+</sup> T cells in which  
246 we deleted or not SOCS1 as described above (**Fig. S4A, B**). We used CD90.1 OT2 CD4<sup>+</sup> and CD45.1  
247 OT1 CD8<sup>+</sup> T cells recognizing MHC-II and MHC-I restricted ovalbumin peptides, respectively and  
248 subcutaneously implanted B16-OVA melanoma cells as tumor model, without conditioning or cytokines  
249 supply (**Fig. 4A**). As compared to the results displayed in Fig. 3, the inactivation of *Socs1* in OT2 cells  
250 had a marginal antitumor effect (**Fig. 4B, C**). This could be related either to the use of the highly  
251 immunosuppressive B16 melanoma model or to the co-transfer of large number of high avidity  
252 antitumor specific CD8<sup>+</sup> T cells. However, after adoptive transfer of sgSOCS1 OT1 T cells (**Fig. 4B,**  
253 **C**), we observed a significant and durable rejection of established tumors as compared to transfer of  
254 mock OT1 T cells ( $p < 0.001$ , log-rank). The infiltration of T cells seven days after transfer showed an  
255 increased accumulation in the TdLN and in the tumor for the group receiving both sgSOCS1 OT1 and

256 sgSOCS1 OT2 cells as compared to mock transferred cells (**Fig. 4D**). Importantly, in the TdLN, *Socs1*  
257 inactivation had a profound effect on OT2 CD4<sup>+</sup> T-cell proliferation with a large increase in fully divided  
258 CD4<sup>+</sup> T cells, whereas the pattern of OT1 CD8<sup>+</sup> T-cell proliferation was barely affected, suggesting that  
259 SOCS1 impacts CD8<sup>+</sup> T-cell survival more than proliferation (**Fig. 4E**). However, as both OT1 mock  
260 and OT1 sgSOCS1 extensively proliferate, our design does not allow us to observe a significant  
261 difference in the CFSE profiles after 8 divisions.

262 Sixty days after transfer, the number of sgSOCS1 OT2 cells ultimately decreased in the blood  
263 of B16-OVA challenged mice, while a population of central memory sgSOCS1 OT1 cells remained 15-  
264 fold more abundant than mock OT1 cells (**Fig. S4C**). These results suggest that SOCS1 decreases the  
265 survival of Ag-exp CD8<sup>+</sup> T cells or prevent the generation of long-lived subsets of CD8<sup>+</sup> T cells. The  
266 former hypothesis is more likely, as tumor-infiltrating sgSOCS1 OT1 cells analyzed 14 days after  
267 transfer expressed higher mRNA levels of molecules involved in T cell survival (*Tnfrsf3*, *Bcl2*, *Il2ra*,  
268 *Il2rb*, *Jak2*) and cytotoxic/effector molecules (*Gzmb*, *Ifngr*, *Irf1*, *Fasl*, *Srgn*, *Tbx21*) (**Fig. S4D**).  
269 Moreover, hallmarks analysis highlighted pathways in tumor-infiltrating sgSOCS1 OT1 cells (*FDR*<  
270 *0.05*), associated with TNF $\alpha$ , IL-2 and IFN- $\gamma$  responses (**Fig. S4E**). Interestingly, the GSEA of *Socs1*-  
271 inactivated OT1 T cells indicates that genes associated with effector functions are more expressed than  
272 those implicated in exhaustion (**Fig. S4F**). Targeting *Socs1* in both OT1 and OT2 cells preserved the  
273 production of IFN- $\gamma$  and GzmB in both CD4<sup>+</sup> and CD8<sup>+</sup> T cells (**Fig. 4F, G**), while GzmB was increased  
274 in CD8<sup>+</sup> T cells (**Fig. 4F**). Overnight *in vitro* stimulation of sgSOCS1 OT1 cells with titrated SIINFEKL-  
275 pulsed DCs led to increased IFN- $\gamma$  and granzyme B production at high antigen doses after *Socs1*  
276 inactivation (**Fig. S4G, H**), showing that *Socs1* actively restrains these cytokines in CD8<sup>+</sup> T cells. The  
277 preserved or increased functionality associated with the increased number of both sgSOCS1 OT2 and  
278 OT1 cells led to a much higher number of effector cells at the tumor site (**Fig. 4F, G**), likely explaining  
279 the stronger anti-tumor effect of *Socs1* inactivated T cells. Altogether, our results show that SOCS1 has  
280 an intrinsic role in the regulation of T cell activation for both CD4<sup>+</sup> and CD8<sup>+</sup> T cells.

### 281 **Immunotherapeutic potential of SOCS1-edited human CD4<sup>+</sup> and CD8<sup>+</sup> CAR T cells**

282 To investigate the therapeutic potential of SOCS1 on human T-cell adoptive transfer, we  
283 inactivated SOCS1 gene using Cas9 RNPs in human peripheral blood lymphocytes (PBL) that had been

284 activated and then transduced with a chimeric antigen receptor, encompassing 4-1BB co-stimulatory  
285 domains targeting CD19, referred to as 19BBz (**Fig. 5A, B, Fig. S5A, B**). This construct, known to  
286 preferentially enhance the survival of CD8<sup>+</sup> CAR-T cells (CAR8) (Guedan et al., 2018), allowed us to  
287 investigate the impact of SOCS1 inactivation on CD4<sup>+</sup> CAR-T cells (CAR4), which have a limited *in*  
288 *vivo* life-span (Turtle et al., 2016; Yang et al., 2017b). After overnight co-culture with the acute  
289 lymphoblastic leukaemia (ALL) FFLuc-BFP NALM6 cell line (NALM6), sgSOCS1 CAR4 and  
290 sgSOCS1 CAR8 exhibited a 2-fold higher killing activity (**Fig. S5C**), consistent with the higher levels  
291 of effector molecules TNF $\alpha$ , IFN- $\gamma$  and GzmB that they produced as compared to mock CAR T cells,  
292 in three healthy donors (**Fig. S5D, E**). Furthermore, we modelled CAR therapy *in vivo* by injecting 4.10<sup>6</sup>  
293 PBL mock or sgSOCS1-treated (2.10<sup>6</sup> CAR4 and 2.10<sup>6</sup> CAR8 cells) in NALM6-infused NOD-scid  
294 IL2R $\gamma$ <sup>-/-</sup> (NSG) mice. Seven days after transfer, the number of sgSOCS1 CAR T cells accumulating in  
295 bone marrow (BM) was 2-fold higher than that of mock CAR T cells (**Fig. 5C, D**). Reflecting the higher  
296 T cell infiltration in the bone-marrow and a more efficient tumor control (**Fig. S5G**), the transcriptomic  
297 profiles of sgSOCS1 CAR4 and CAR8 cells at day 7 evidenced upregulation of molecules associated  
298 with activation (*FOS*, *JUND*, *CD69*, *SOCS3*), with long-lived associated factors (*IL7R*, *PIM1* (Knudson  
299 et al., 2017), *TCF7* (Zhou and Xue, 2012) and *KLF2* (Carlson et al., 2006)), resistance to apoptosis  
300 (*BCL2L11* (Hildeman et al., 2002) *NDFIP2* (O'Leary et al., 2016)), key regulators of cytotoxic effector  
301 functions (*GMZB*, the interferon-induced molecules *GBP5* (Krapp et al., 2016) and *IRF1* and killer  
302 associated *NKG7* (Patil et al., 2018)) (**Fig. 5E**).

303 As observed in several studies on CAR-T cell kinetics (Guedan et al., 2018) and CD4/8 CAR-  
304 T subset analysis in ALL patients (Turtle et al., 2016; Yang et al., 2017b), CAR8 expanded preferentially  
305 over CAR4 in our model. We therefore examined the persistence of sgSOCS1 CAR T-cells, 28 days  
306 after transfer. Whereas mock CAR4 declined over time, sgSOCS1 CAR4 and sgSOCS1 CAR8  
307 significantly accumulated in both BM and spleen of NSG mice, correlating with NALM6 rejection (**Fig.**  
308 **S5G, H**). Most strikingly, sgSOCS1 CAR4 expanded to the level of sgSOCS1 CAR8 (**Fig. 5C, D**).  
309 Accordingly, as compared to their mock CAR counterparts in the bone marrow, both sgSOCS1 CAR4  
310 and CAR8 expressed increased levels of cytotoxic/effector-related molecules including *IFNG*, *FCRL6*  
311 (Wilson et al., 2007), *CTSB* (Balaji et al., 2002), *TBX21*, as well as SOCS1-known targets/survival genes

312 such as *IL2RB*, *JAK3*, *BCL3* and *CXCL13*, highlighting their tumor reactivity (Li et al., 2019) (**Fig.**  
313 **5F**). *SOCS1* inactivation led to different transcriptome patterns in CAR4 and CAR8. Transcriptomic  
314 analysis of CAR4 evidenced increased expression of pro-survival and self-renewal genes including  
315 *IL21*, the insulin growth factor regulator *HTRA1* (Ding and Wu, 2018), and the AMPK-TORC1  
316 metabolic checkpoint *NUAK1* (Monteverde et al., 2018) (**Fig. 5F, G**). This was associated with a  
317 proliferation signature represented by E2F targets (**Fig. 5F, G**). CAR8 displayed signs of enhanced  
318 cytotoxicity (*GZMB*, *GZMH*, *TNFSF10* (TRAIL), Secreted And Transmembrane 1 *SECTM1* (Wang et  
319 al., 2012), Killer Cell Lectin Like Receptor D1 *KLRD1* (Li et al., 2019)), some of which were  
320 confirmed by flow cytometry analysis (**Fig. 5F, H Fig. S5J**). Contrary to sgSOCS1 CAR4 cells, CAR8  
321 sgSOCS1 expressed lower levels of E2F targets (**Fig. 5G**), suggesting that the higher number of cells  
322 found in the BM is related more to survival than proliferation (Ren et al., 2002). While sgSOCS1 CAR  
323 cells exhibited a PD1<sup>+</sup>LAG3<sup>+</sup> phenotype (**Fig. S5J**), implying continuous antigen stimulation, their  
324 transcriptional program was more similar to an effector memory than an exhausted signature (Wherry  
325 and Kurachi, 2015) (**Fig. S5F**). At late time point (28 days after transfer), not only SOCS1 inactivation  
326 led to increased numbers of CAR4 and CAR8 but also to higher cytokine secretion and cytotoxic activity  
327 (**Fig. 5H, I, Fig. S5I**). Both the increased in numbers and effector functions of the *SOCS1*-inactivated  
328 ATCT probably account for their significantly stronger antitumor effects as compared to mock CAR-T  
329 cells, with lower tumor load and better survival of NALM6-bearing mice (**Fig. 5J, K**).

## 330 **Discussion**

331 Looking for the mechanisms involved in the regulation of CD4<sup>+</sup> T cell proliferation during an  
332 antigenic response, we uncovered SOCS1 as a non-redundant signaling node, leading to a negative  
333 feedback loop downstream of TCR and lymphokine signaling. SOCS1 appears to actively restrain T cell  
334 proliferation, survival and effector functions during an antigenic immune response. Inactivating *Socs1*  
335 evidenced different effects on CD4<sup>+</sup> and CD8<sup>+</sup> T cells: it greatly improved CD4<sup>+</sup> T cell proliferation and  
336 survival while it mostly increased the effector function of CD8<sup>+</sup> T cells with a small effect on cell  
337 survival. *Socs1* inactivation in T cells specific for tumor antigens resulted in enhanced anti-tumor  
338 activity after adoptive transfer in both mouse and human models. This may have important therapeutic  
339 implications.

340 In two different TCR-Tg models (Marilyn and OT2), we demonstrated that SOCS1 is a major  
341 intrinsic negative regulator of Ag-exp CD4<sup>+</sup> T-cell expansion *in vivo*. We report the same findings in  
342 these two CD4<sup>+</sup> T-cell models exhibiting distinct avidities, mode of secretion (Robinson et al., 1986)  
343 and using different type of antigenic stimulations such as DC-peptide stimulation or tumor challenge.  
344 Altogether, this highlights the generalizable aspect of our discovery, operating for all CD4<sup>+</sup> T cells.  
345 Surprisingly, our *in vivo* genome-wide positive screen evidenced only one hit, *Socs1*. It is highly  
346 probable that the genes necessary for *in vitro* growth and survival were missed as we used a constitutive  
347 CRISPR/Cas9 system. In addition, the restored proliferation of antigen experienced Marilyn cells by  
348 blocking both IL2 and IFN- $\gamma$  pathways in our model, suggest a genetic redundancy and compensation  
349 between inactivated receptors that could not be revealed by our screening strategy.

350 Our data suggest that cytokine sensing play a role in impairing CD4<sup>+</sup> T cells immunity after Ag  
351 re-exposure/chronic stimulation. This paradoxical cytokine-mediated suppression of CD4<sup>+</sup> T cells has  
352 already been described, when blocking chronic IFN-I signaling during persistent infection enhanced  
353 CD4<sup>+</sup> T cell-dependent virus clearance (Teijaro et al., 2013; Wilson et al., 2013). SOCS1 may be  
354 responsible for the so-called activation induced cell death (AICD), where IL-2 (Lenardo, 1991) or IFN-  
355  $\gamma$  (Berner et al., 2007) provided too early after antigen stimulation leads to apoptosis of CD4<sup>+</sup> T cells  
356 (Majri et al., 2018). Hence, we observed that SOCS1 prevented the expression of genes involved in  
357 resistance to apoptosis, such as *Bcl2*, *Bcl3*, *Tnfrsf3*, *Hopx* (Albrecht et al., 2010). SOCS1 also appears  
358 to selectively regulate the proliferation of CD4<sup>+</sup> T cells as compared to CD8<sup>+</sup> T cells *in vivo* by inhibiting,  
359 both in human and murine CD4<sup>+</sup> T cells the expression of E2F targets, which are key regulators of cell  
360 cycle progression (Zhu et al., 2001). Thus, targeting SOCS1 improves CD4<sup>+</sup> T cells survival and  
361 proliferation by rendering them insensitive to out of sequence lymphokine-induced cell death. This  
362 phenomenon has been described for SOCS3, another member of SOCS family, which is involved in the  
363 impairment of human and murine CD4<sup>+</sup> T cells *in vivo*, after cytokine pre-exposure (Sckisel et al., 2015).  
364 However, SOCS3 expression is associated with Th2 lineage commitment, while SOCS1 is involved in  
365 Th1 differentiation (Egwuagu et al., 2002).

366 As SOCS1 negatively regulates Ag-exp CD4<sup>+</sup> T-cell capacity to produce several cytokines  
367 essential for anti-tumor immunity (Dobrzanski, 2013), we explored the direct and indirect impact of

368 *Socs1* deletion on adoptively transferred antitumor CD4<sup>+</sup> T cells. Targeting SOCS1 also increases Ag-  
369 exp CD4<sup>+</sup> T-cell polyfunctionality *in vivo*, enhancing their lymphokines secretion, in particular IFN- $\gamma$   
370 in the TdLN (Fig. 3) and at the tumor site (**Fig. 4, Fig. 5**). This may account for the higher number of  
371 active CD8<sup>+</sup> T cells and NK cells infiltrating the tumor (**Fig. 3I, J; Fig. 4F, G**). The increased infiltration  
372 and persistence of functional CD4<sup>+</sup> T cells could participate to tumor rejection by helping CD8<sup>+</sup> T cell  
373 priming or migration to the tumor bed, recruiting innate cells or directly killing tumor cells (Borst et al.,  
374 2018). Thus, both murine and human CD4<sup>+</sup> T cells targeted for SOCS1 exhibit an increased expression  
375 of the cytotoxic molecule GZMB at the tumor site (**Fig. 3, Fig. 5**). The acquisition of such cytotoxic  
376 features by CD4<sup>+</sup> T cells have been recently associated with a Blimp-1-dependent IL-2 autocrine  
377 stimulation (Śledzińska et al., 2020). Hence, through both extrinsic and intrinsic mechanisms (Zander  
378 et al., 2019), the transfer of *Socs1*-deleted tumor specific CD4<sup>+</sup> T-cell improve the magnitude of the  
379 endogenous antitumor immune response as well as infiltration by cytotoxic CD4<sup>+</sup> T cells, which act in  
380 concert toward tumor eradication.

381 With no effect on CD8<sup>+</sup> T cell division and little impact on their survival *in vivo*, SOCS1  
382 significantly impedes CD8<sup>+</sup> T cell cytotoxicity. This could be the result of enhanced sgSOCS1 CD4<sup>+</sup>  
383 helper function as both CD4<sup>+</sup> and CD8<sup>+</sup> T cells are co-transferred. However, Marilyn sgSOCS1 do not  
384 increase the cytotoxic capacity per cell basis of CD8<sup>+</sup> and NK cells from the endogenous compartment.  
385 Furthermore, we demonstrated *in vitro* that SOCS1 actively restrained the TCR-induced capacity to  
386 produce IFN- $\gamma$  and GZMB of CD8<sup>+</sup> T cells. Altogether, this demonstrated that SOCS1 inactivation per  
387 se increased the cytotoxic potential of T cells. This effect could be mediated by IRFs, which are central  
388 amplifier circuits downstream IFN-I and IFN-II signaling (Michalska et al., 2018), regulating the  
389 expression of both IFN- $\gamma$  and granzyme B (Guinn et al., 2016). In addition to IRF4, it appears that other  
390 IRFs family members, including IRF1 and IRF8 (**Fig. S4, Fig. 5**) are modulated by SOCS1.

391 With an improved persistence *in vivo*, SOCS1 targeted CD4<sup>+</sup> T cells are probably subjected to  
392 chronic stimulation that might lead to anergy and Tregs conversion (Alonso et al., 2018). However,  
393 SOCS1 is essential for the maintenance of Foxp3 expression and for Tregs suppressive functions *in vivo*  
394 (Takahashi et al., 2011, 2017). Accordingly, *Socs1*-inactivated Marilyn CD4<sup>+</sup> T cells display enrichment  
395 of conventional T cells markers as opposed to Tregs genes (**Fig. S3C**). Moreover, we noticed a decreased



396 gene expression of *FOXP3* in sgSOCS1 CAR4 as compared to mock CAR4 at late time point (**Fig. 5G**).  
397 Altogether, it seems that targeting SOCS1 in CD4<sup>+</sup> T cells may prevent them to convert into Tregs.

398 The forced expression of cytokine-encoding genes or construct containing a JAK/STAT  
399 signaling domain in CD8<sup>+</sup> CAR-T cells improves their persistence and antitumor effects *in vivo*,  
400 highlighting the importance of signal 3 for CAR-T cell functions (Kagoya et al., 2018; Markley and  
401 Sadelain, 2010; Quintarelli et al., 2007). Here, we demonstrate that inactivating a major inhibitor of  
402 cytokines signaling in CAR-T cells also enhance their therapeutic potential and most importantly  
403 selectively affect CD4<sup>+</sup> and CD8<sup>+</sup> CAR-T cells. This has major relevance to design and potentiate the  
404 next generation of adoptive T cells therapies for cancer and viral infections with an optimized  
405 composition and improved efficacy. However, the reduced control in cytokine signaling could  
406 potentially increase the risk for cytokine release syndrome (CRS), especially since SOCS1 has been  
407 shown to regulate IL6 signaling (Diehl et al., 2000). This issue might nevertheless be addressed using  
408 an inducible and reversible gene inactivation for clinical translation (Lucibello et al., 2020).

409 Our findings demonstrate the feasibility of interrogating *in vivo* genome-wide mutated primary  
410 CD4<sup>+</sup> T cells, applicable to further study CD4<sup>+</sup> T-cell or regulatory T-cell plasticity and functions. This  
411 work underlies the relevance of understanding CD4<sup>+</sup> T cell biology for the development of effective T  
412 cell-mediated therapies. We unravel the importance of signal 3 regulation in CD4<sup>+</sup> T cell biological  
413 functions and identified a major intracellular checkpoint critical for the magnitude, duration and quality  
414 of T cell immune responses, that may prove efficacy in clinics.

415

## 416 **Acknowledgments**

417 We thank Lorenzo Galluzzi for his general comments, Nina Burgdoff and Sheila Lopez for the  
418 technical support they provided with *in vivo* and CAR-T cells experiments. We thank the zootechnicians  
419 of the mouse facility plateforme of the Institut Curie as well as the flow cytometry core. We thank  
420 Audrey Rapinat from the Genomics Platform of the translational research department at Institut Curie.  
421 We thank Jessie Thalmensi for providing advices concerning the MB49 tumor model and Christel  
422 Goudot for coordinating the NGS sequencing analysis. High throughput sequencing has been performed



423 by the ICGex NGS platform of the Institut Curie (Sonia Lameiras, Virginie Raynal, Patricia Legoux)  
424 supported by the grants ANR10EQPX03 (Equipex) and ANR10INBS0908 (France Génomique  
425 Consortium) from the Agence Nationale de la Recherche ("Investissements d'Avenir" program), by the  
426 Cancerpole Ile de France and by the SiRICCurie program. Laurie Menger was supported by a Marie-  
427 Skłodowska Curie individual fellowship (grant 743435) from the European Commission, INSERM and  
428 Agence Nationale de la Recherche (ANR jeune chercheur JCJC 2018). Olivier Lantz was supported by  
429 the Institut National de la Santé et de la Recherche Médicale, Institut Curie, ARC foundation, fondation  
430 Trouver et Chercher.

431

#### 432 **Author Contributions**

433 Conceptualization: L.M; O.L; Methodology and Investigation: A.SDG, S.M, F.L, J.F, A.D, M.S, M.D,  
434 J.T, P.G; Writing – Original Draft, L.M; Writing – Review & Editing: J.H, DC.R, M.S, G.S, S.A, O.L,  
435 L.M.

#### 436 **Declaration of Interests**

437 The authors declare that they have no competing financial interests. S.A and L.M hold a patent on  
438 "IMMUNE CELLS DEFECTIVE FOR SOCS1" (EP20305878).

439

#### 440 **Figures titles and legends**

441 **Fig. 1. *In vivo* genome-scale (18400 genes) CRISPR pooled screens identify SOCS1 as non-**  
442 **redundant inhibitor of Antigen-experienced (Ag-exp) CD4 T cell expansion during an ongoing**  
443 **immune response.**

444 (A) Two cohorts experimental design to assess naive and Ag-exp CD4 T cell expansion in the course of  
445 an ongoing immune response used in B-D. (B) Flow plots and percentage (percentage highlighted are  
446 from singlets live CD45.1<sup>+</sup> CD4 T cells) of proliferating Marilyn CD4 T cells, either 10<sup>6</sup> naive or 2.10<sup>6</sup>  
447 Ag-exp *in vitro* (based on CD62L positivity, reflecting a similar capacity to home to the LN), during an  
448 ongoing immune response in C57BL/6 mice. Mice were injected with 10<sup>6</sup> cells intravenously and primed  
449 *in vivo* by injection of 10<sup>6</sup> Dby peptide-loaded LPS-matured DCs into the footpad. (C, D) Survival and

450 IL2 production of CD45.1 Ag-exp CD4 T cells compared to naïve CD45.1 Marilyn CD4 T cells during  
451 a recall response *in vivo*. (E) Ag-exp Cas9-Marilyn CD4 T cells CD44/CD62L phenotype and lentiviral  
452 library transduction efficiency (BFP<sup>+</sup>), prior to puromycin selection and injection *in vivo*. (F) Scatter  
453 plot comparing sgRNA normalized read counts in the original plasmid DNA library and in the  
454 transduced T cells after 4 days of puromycin selection (5µg/mL). (G) Representative flow plots and  
455 quantification of proliferating CD45.1-library-transduced Cas9-Marilyn CD4 T cells compared to  
456 CD45.1-Mock-transduced Cas9-Marilyn CD4 T cells, in the presence of the first cohort or not. Mice  
457 were injected with 12.10<sup>6</sup> CD4 T cells IV and primed with 4.10<sup>6</sup> Dby peptide-loaded LPS-matured DCs  
458 in the footpad at day 0 and day 7. (H) Enriched hits in the CFSE<sup>lo</sup> subset of CD45.1-library-transduced  
459 CD4 T cells compared to the CFSE<sup>hi</sup> subset in an ongoing immune response *in vivo* (strong selection).  
460 (I) Representative plots and percentage (gated on singlets live CD45.1<sup>+</sup> CD4 T cells) of proliferating  
461 Ag-exp Mock Marilyn or sgSOCS1 Marilyn cells during a recall response, at day 14. Mice were injected  
462 with 10<sup>6</sup> CD4 T cells IV and primed with 10<sup>6</sup> peptide-pulsed LPS-matured DCs at day 0 and day 7. (G,  
463 H) Data shown are from two independent primary GW screens. (H) *p-value* corresponds to the gene-  
464 level enriched *p-value* and log2 fold change (LFC) to the median LFC of all sgRNA supporting the  
465 enriched RRA score. Targets with an FDR < 0.5 are highlighted in black. Each point is an individual  
466 mouse, open symbols are replicates from independent experiments (FP: footpad, DC: dendritic cells,  
467 pept: peptide, Ag-exp: antigen-experienced).

468 **Fig. 2. SOCS1 is a node integrating several cytokines signals to actively silence polycytokine**  
469 **release.**

470 (A) SORTing strategy of CFSE<sup>lo</sup> (green) and CFSE<sup>hi</sup> (red) naïve or Ag-exp Marilyn cells from an  
471 ongoing immune response. (B) Heat map displaying the expression of a selected list of cytokine  
472 receptors by proliferating or inhibited Marilyn cells (first seven receptors *p*<0.01, FDR<0.5). (C)  
473 Representative flow plots (percentage highlighted are from singlets live CD45.1<sup>+</sup> CD4 T cells) and  
474 quantification of 10<sup>6</sup> Marilyn naïve IFNγ-R<sup>+/-</sup> or Marilyn Ag-exp IFNγ-R<sup>+/-</sup> or Ag-exp IFNγ-R<sup>-/-</sup>  
475 expansion *in vivo* after cells transfer and footpad vaccinations at day 14, with or without (w/o) cohort 1  
476 expansion. (D) Representative flow plots (percentage highlighted are from singlets live CD45.1<sup>+</sup> CD4  
477 T cells) and quantification of 10<sup>6</sup> Marilyn Ag-exp expansion *in vivo* during a recall response, in the

478 presence of blocking antibodies (200 $\mu$ g) injected intraperitoneally at day 7, day 9, day 11: isotypes, anti-  
479 IL2R $\beta$ , anti-IFN $\gamma$ R $\alpha$ . (E) Flow cytometric evaluation of CD69, CD25, IRF4 and expression in sgSOCS1  
480 Ag-exp Marilyn compared to Mock cells after overnight co-culture with peptide-pulsed LPS-matured  
481 DCs *in vitro*, in the absence of cytokine. (F) Flow plots and percentage of IFN- $\gamma$ -, TNF $\alpha$ - and IL-2-  
482 producing Mock or sgSOCS1 Marilyn. Values are shown as means or means  $\pm$  SD. Each point is an  
483 individual mouse, open symbols are replicates from independent experiments, analyzed by Mann-  
484 Whitney U tests or two-way ANOVA (E).

485 **Fig. 3. *Socs1* inactivation in Ag-exp Marilyn CD4 T cells enhances the rejection of male bladder**  
486 **MB49 tumors.**

487 (A) Schematic of Marilyn CD4 T cells (ACT) in C57BL/6 female mice-bearing the male DBY-  
488 expressing bladder tumor line MB49. (B) Growth curves of MB49 tumors in C57BL6 mice following  
489 the different ACT: PBS control, adoptive transfer of 10<sup>6</sup> mock Ag-exp Marilyn or 10<sup>6</sup> sgSOCS1 Ag-exp  
490 Marilyn Cas9. (C) Tumor-free survival following ACT, log-rank (Mantel-Cox) test. (D) Representative  
491 flow plots and quantification of Mock or sgSOCS1 Marilyn cells in the tumor draining lymph node  
492 (TdLN), in the tumor and in the irrelevant lymph nodes (irr-LN) at day 7 after ACT. (E) Representative  
493 flow plots and percentage of mock and sgSOCS1 Marilyn cells proliferation in the TdLN at day 7 after  
494 ACT. (F) Gene set enrichment analysis (GSEA) of selected hallmarks transcriptional signatures  
495 (MSigDB) with an FDR value < 0.05 in Ag-exp sgSOCS1 versus Ag-exp mock Marilyn T cells in the  
496 TdLN (n = 3 replicates from 2 pooled mice). (G) Representative flow plots and quantification of IFN $\gamma$ <sup>+</sup>  
497 IL2<sup>+</sup> and IFN $\gamma$ <sup>+</sup> TNF $\alpha$ <sup>+</sup>- producing mock or sgSOCS1 Marilyn CD4 T cells in the TdLN at day 7 after  
498 transfer. (H) Flow plot and quantification of granzyme B (GZMB) expressed by tumor-infiltrating  
499 sgSOCS1 Marilyn CD4 T cells at day 7. (I, J) Representative flow plots and quantification of CD8- and  
500 NK-tumor infiltrating cells, producing effector molecules at day 7 after Marilyn cells transfer. Data are  
501 shown as mean, analyzed by Mann-Whitney U tests, from two independent experiments, n=4-6  
502 mice/group.

503 **Fig.4. B16-OVA tumor rejection with improved ACT: *Socs1* gene inactivation restores the**  
504 **proliferation of OT2 cells and enhances OT1 cell survival and cytotoxicity.**

505 (A) Schematic of OT1 CD8- and OT2 CD4- adoptive T cell therapy (ACT) in C57BL/6 mice-bearing  
506 B16-OVA melanoma tumors. (B) Growth curves of B16-OVA tumors in C57BL6 mice following  
507 adoptive transfer with OT1 ( $2.10^6$  Mock or  $2.10^6$  sgSOCS1) and OT2 cells ( $2.10^6$  Mock or  $2.10^6$   
508 sgSOCS1). (C) Kaplan-Meier survival analysis of B16-OVA-bearing mice following ACT, log-rank  
509 (Mantel–Cox) test. (D) Representative plots and quantification of Mock or sgSOCS1 OT1 and OT2 cells  
510 in the tumor draining lymph node (TdLN), in the tumor or in the irrelevant lymph nodes (Irr-LN) at day  
511 7 after ACT, gated on singlets live V $\alpha$ 2+ T cells. (E) Representative flow plots and percentage of Mock  
512 or sgSOCS1 OT1 and OT2 cells proliferating in the TdLN at day 7. (F, G) Representative flow plots  
513 and quantification of mock or sgSOCS1 OT2 and OT1 tumor-infiltrating cells producing IFN- $\gamma$  and  
514 granzyme B molecules and at day7 after transfer. Data are shown as mean, analyzed by Mann–Whitney  
515 U tests, from two independent experiments,  $n=5-8$  mice/group.

516

517 **Fig. 5. SOCS1 inactivation restores CAR4 T cell expansion *in vivo* and boosts CAR8 T cell efficacy**  
518 **in controlling B-ALL disease.**

519 (A) Schematic of CAR-T cell engineering and adoptive T-cell therapy (ATCT) with  $2.10^6$  CD4 CAR  
520 (CAR4) and  $2.10^6$  CD8 CAR (CAR8) T cells of NALM6-Luc-bearing mice. (B) CAR expression  
521 assessed using CD19/Fc fusion protein and central memory phenotype prior to NSG injection. (C, D)  
522 Representative flow plots and quantification of bone marrow infiltration with CAR4 and CAR8 mock  
523 and sgSOCS1 in NALM6-Luc bearing NSG mice at day 7 and day 28 after transfer, gated on singlets  
524 live HLA-I $^+$ , CD45.2 $^-$  mouse cells (E) Heat map of selected differentially expressed genes (FDR<0.05)  
525 between mock and sgSOCS1 CAR T cells related to activation (red), proliferation/survival (blue) and  
526 effector functions (green) at day 7 after transfer. (F) Differentially expressed genes between mock and  
527 sgSOCS1 CAR T cells at day 28 after transfer, with proliferation/survival (blue names) and  
528 effector/cytotoxic molecules (green names) highlighted. Transcripts with an FDR value <0.05 are  
529 highlighted in light green (G) Gene set enrichment analysis of the transcriptional signatures from  
530 hallmarks signatures in CAR4/8 sgSOCS1 versus CAR4/8 mock ( $n = 6$  mice). (H, I) Representative  
531 flow plots and quantification of effector molecules produced by CAR T cells from infiltrated BM at day  
532 28. (J, K) Kaplan–Meier analysis of survival of NSG mice and NALM6-Luc tumor growth after ATCT

533 with  $2.10^6$  CAR4/8 mock or  $2.10^6$  CAR4/8 sgSOCS1. Data are represented as mean, analyzed by Mann–  
534 Whitney U tests or two-way ANOVA, from two independent experiments ( $n=3-5$  mice/group).

535

## 536 **Methods**

### 537 **Lead Contact**

538 Further information and requests for resources and reagents should be directed to and will be fulfilled  
539 by the Lead Contact, Laurie Menger ([laurie.menger@curie.fr](mailto:laurie.menger@curie.fr))

### 540 **Materials Availability**

541 This study did not generate new unique reagents.

### 542 **Data and Code Availability**

543 The affymetrix and RNAseq data supporting this study have been deposited in the GEO database under  
544 the accession number GSE154794. The SRA database accession number for the screens analysis is  
545 PRJNA639469 (Temporary Submission ID: SUB7577588) and will be accessible at  
546 <https://www.ncbi.nlm.nih.gov/sra/PRJNA639469>.

### 547 **Experimental model and subject details**

#### 548 **Cell lines and mice**

549 B16-OVA and MB49 cell lines, kindly provided by E. Piaggio and C. Théry, FFLuc-BFP NALM6  
550 (NALM6) cell line, provided by O. Bernard were maintained in RPMI-1640 supplemented with 10%  
551 FBS. CD45.1 and CD45.2 female Marilyn TCR-transgenic Rag2<sup>-/-</sup> mice, specific for the HY male  
552 antigen were crossed to Rosa26-Cas9-EGFP knock-in mice (026179, Jackson lab). Thy1.1 and Thy1.2  
553 OT-II TCR-transgenic Rag2<sup>-/-</sup> mice, CD45.1 female OT-I TCR-transgenic Rag2<sup>-/-</sup> mice, specific for  
554 OVA and female, male NOD-scid IL2R $\gamma$ <sup>-/-</sup>(NSG) mice were also used in this study. Female C57BL/6  
555 mice were purchased from Charles River Laboratories (L'Arbresle, France). All experiments were  
556 conducted with 6-12 weeks old mice, in an accredited animal facility by the French Veterinarian  
557 Department following ethical guidelines, approved by the relevant ethical committee (*AP AFIS#6030-*  
558 *20 16070817147969 v2*, authorisation #XX DAP 2017-023).

559

560 **Cell culture and adoptive transfers**

561 Naive CD4<sup>+</sup> T cells were obtained from peripheral lymph nodes of Marilyn or OT-II mice. Antigen  
562 experienced CD4<sup>+</sup> T cells were generated *in vitro* by priming lymph nodes and splenocytes of CD45.1  
563 Marilyn mice or Thy1.1 OT-II mice with respectively 10nM Dby (NAGFN- SNRANSSRSS,  
564 Genscript) and 5μM OVA<sub>II</sub> peptide (InvivoGen). IL-2 (10ng/mL), IL-7 (2ng/mL) (Peprotech) were  
565 added starting at day 4 and every 3 days in complete RPMI-1640 supplemented with 10% FBS and  
566 0.55 mM β-mercaptoethanol, while resting for 6-10 days. Ag-exp OT-I cells from lymph nodes and  
567 spleen were cultured with 0.5μM SIINFEKL (InvivoGen) and maintained with IL15 (50ng/mL)  
568 (Peprotech) every two days. T cells were labeled with 5μM CFSE (Invitrogen) in PBS for 8 minutes  
569 at 37°C. For *in vivo* GS screen, 4.10<sup>6</sup> naïve CD45.2 Marilyn CD4<sup>+</sup> T cells were transferred and footpad  
570 vaccinated with 4.10<sup>6</sup> Dby-loaded-LPS-matured bone marrow derived-dendritic cells (BMDCs).  
571 Seven days later, 12.10<sup>6</sup> library-transduced or 12.10<sup>6</sup> Mock-transduced CD45.1 Cas9-Marilyn cells  
572 were injected intravenously and mice were at the same time footpad-vaccinated with 4.10<sup>6</sup> Dby-  
573 loaded-LPS-matured BMDCs. For validation experiments, a first cohort of 10<sup>6</sup> naïve CD45.2 Marilyn  
574 or Thy1.2 OT-II cells was transferred into CD45.2 B6 hosts footpad vaccinated with 10<sup>6</sup> peptide-  
575 loaded-LPS-matured BMDCs. After 7 days, a second cohort of either 10<sup>6</sup> naïve CD45.1 Marilyn,  
576 Thy1.1 OT-II cells or 2.10<sup>6</sup> Ag-exp CD45.1 Marilyn, 2.10<sup>6</sup> Thy1.1 OT-II CD4<sup>+</sup> T cells were injected  
577 and mice were footpad-vaccinated with 10<sup>6</sup> peptide-loaded-LPS-matured BMDCs. The number of  
578 injected cells as a second cohort is based on CD62L positivity, reflecting the capacity of naïve and  
579 memory (Ag-exp) CD4 T cells to similarly home to the LN. BMDCs were generated by 10 days culture  
580 in complete IMDM containing 20ng/ml of GM-CSF (Peprotech) and maturation was induced by a 20-  
581 hour treatment with 1ug/mL lipopolysaccharide (Sigma-Aldrich), pulsed with 50nM Dby or 20μM  
582 OVA<sub>II</sub> peptide for 2hours. Mice were treated with blocking antibodies from Bioxcell, including  
583 isotypes control rat IgG2b (clone LTF2), IgG2a (clone 2A3), anti-mouse CD122 antibody (clone TM-  
584 Beta1), anti-mouse IFN-γR (clone GR-20), intraperitoneally on day 7, 11 and day 11 after ACT (10  
585 mg/kg).  
586 For adoptive cell therapies, female C57BL6 host were subcutaneously implanted with either 1.5.10<sup>6</sup>

587 male bladder MB49 tumor cells or  $4.10^5$  B16-OVA melanoma cells. At day 10 for the MB49 model  
588 and on day 7 for B16-OVA,  $10^6$  Marilyn CD4<sup>+</sup> T cells or  $2.10^6$  OT-I and  $2.10^6$  OT-II cells were  
589 adoptively transferred into tumor-bearing mice (n = 4-6/group). Mice were sacrificed when the tumors  
590 exceeded 15 mm in diameter for the B16-OVA model.

591 Peripheral blood mononuclear cells (PBMCs) from healthy donors were isolated by density gradient  
592 centrifugation. T lymphocytes were purified using the Pan T cell isolation kit (Miltenyi Biotech) and  
593 activated with Dynabeads Human T-Activator CD3/CD28 (1:1 beads:cell) (ThermoFisher) in X-vivo  
594 15 medium (Lonza) supplemented with 5% human serum (Sigma) and 0.5 mM  $\beta$ -mercaptoethanol at  
595 density of  $10^6$  cells/mL. 48 hours after activation, T cells were transduced with lentiviral supernatants  
596 of an anti-CD19(FMC63)-CD8tm-4IBB-CD3 $\zeta$  CAR construct (rLV.EF1.19BBz, Flash Therapeutics) at  
597 MOI 10. Two days later, the CD3/CD28 beads were magnetically removed, CAR T cells were  
598 electroporated with Cas9-ribonucleoproteins (Cas9-RNP) and maintained in X-vivo supplemented with  
599 IL7 (5ng/mL) and IL15 (5ng/mL). Six days after electroporation, CD4<sup>+</sup> and CD8<sup>+</sup> CAR-T cell were  
600 separated using CD8<sup>+</sup> T Cell Isolation kit (Miltenyi) for mutagenesis quantification on gDNA and  
601 western blot analysis of SOCS1 expression.

602 Male or female 8–12-week-old NSG mice were injected with  $2.10^5$  NALM6 cells intravenously by tail  
603 vein injection. Three days later,  $2.10^6$  CAR T cells were administered intravenously by tail vein injection  
604 (day 0). Tumor burden was measured by bioluminescence imaging using the Lumina IVIS Imaging  
605 System (PerkinElmer). Mice were sacrificed when the radiance was  $> 5.10^6$  [p/s/cm<sup>2</sup>/sr].

### 606 **Cytotoxicity assays**

607 The cytotoxicity of T cells transduced with a CAR was determined by co-culturing in triplicates at the  
608 indicated *E/T* ratio, CAR T cells (Effectors) with Nalm6 cells (Targets) in a total volume of 100  $\mu$ l per  
609 well in X-vivo medium. The maximal luciferase expression (relative light units; RLU<sub>max</sub>) was  
610 determined with target cells alone plated at the same cell density. 18 h later, 100  $\mu$ l luciferase substrate  
611 (Perkin Elmer) was directly added to each well. Luminescence was detected using a SpectraMax ID3  
612 plate reader (VWR). Lysis was determined as  $(1 - (RLU_{\text{sample}})/(RLU_{\text{max}})) \times 100$ .

### 613 **Antibodies and Flow cytometry analysis**



614 Lymph nodes cells, splenocytes and tumor samples enriched on a density gradient medium (Histopaque,  
615 Sigma) were incubated with murine antibodies (Key Resources Table). Human cultured cells, bone  
616 marrow cells and splenocytes from NSG mice cells were stained with the indicated Abs or soluble  
617 protein: fluorochrome-conjugated antibodies specific for human (Key Resources Table). The  
618 intracellular staining was performed either with intracellular staining permeabilization wash buffer (BD  
619 Bioscience) or Foxp3 kit (eBioscience). CAR expression was assessed using 9269-CD-050  
620 Recombinant Human CD19 Fc Chimera Protein (Bio Techne), at 4°C for one hour, at 1/100 dilution.  
621 Viability was evaluated using Fixable Viability Dye eFluor 780 (eBioscience) or Aqua Live dead  
622 (Thermo Fisher). Re-stimulation was performed with 20ng/mL of PMA (Sigma), 1µM of ionomycin  
623 (Sigma) and BD Golgi plug for 4 hours at 37°C. Cell Sorting Set-up Beads (Life Technologies) were  
624 used to quantify and normalized cell number between samples and experiments. Stainings were  
625 performed in a blocking solution: 5% FCS, and 2% anti-FcR 2.4G2, and samples acquired on a LSRII/  
626 Fortessa (BD) and analyzed with FlowJo software (V10, Tree Star). Cell sorting was performed on  
627 ARIAII (BD).

#### 628 **Western blot analysis**

629 T cells ( $2.10^6$ ) were lysed using RIPA lysis buffer (Thermofisher) and 1X Protease Inhibitor Cocktail  
630 (Sigma). Cell debris were removed by centrifugation at 14,000 rpm for 15 min at 4°C and 20-40µg of  
631 proteins from the supernatant were separated using SDS-PAGE and transferred to a PVDF membrane.  
632 SOCS1 and β-actin (loading control) were visualized using monoclonal antibodies anti-SOCS1  
633 (1µg/mL) (ab62584; Abcam), anti-Actin mouse (Millipore, clone C4), HRP-anti-Rabbit IgG1 (Cell  
634 Signaling Technology). HRP-anti mouse IgG (Cell signaling) on Chemidoc Touch Imaging system  
635 (Biorad). Signal intensity was quantified with ImageJ software.

#### 636 **Genome-wide CRISPR-Cas9 screens**

637 The lentiviral gRNA plasmid library for genome-wide CRISPR-Cas9 screen (Mouse Improved  
638 Genome-wide Knockout CRISPR Library v2, Pooled Library #67988#) and mock vector (#67974)  
639 was obtained from Addgene. The library was amplified following the protocol provided by Addgene.  
640 Briefly, 4X25ul of NEB 10-beta Electrocompetent *E. coli* (NEB, cat. no. C3020K) were electroporated

641 with of 4X10 ng/μl and cultured in 4X500mL of ampicillin-treated Luria-Bertani (LB) incubate at 37  
642 °C overnight with shaking. The plasmids were extracted with 12 columns of EndoFree plasmid Maxi  
643 kit (Qiagen). To prepare the virus library, 293T cells at low passage (<7) in 20cm dish (X15) were  
644 transfected with 11 μg of gRNA library, 11 μg of psPAX2 and 2.5 μg of pVSV-G. Twenty-four hours  
645 after transfection, the medium was changed to DMEM-1% BSA, collected at 48h, 60h and 72h, then  
646 centrifuged, filtered through 0.45μM PVDF membranes (Millipore), concentrated using Amicon Ultra  
647 15ml centrifugal filters (Merck) and used fresh. One day before T cells transduction, CD4<sup>+</sup> T cells are  
648 enriched using MagniSort Mouse CD4<sup>+</sup> T cell Enrichment Kit (Thermofisher scientific) and seeded  
649 at a density of 1.5.10<sup>6</sup> cells/ml with ½ fresh medium and ½ culture medium supplemented with IL-2  
650 (10ng/ml), IL-7 (2ng/ml). Cells are spinfected for 90min, at 32°C, 900g with 10ug/ml of protamine  
651 sulfate (Sigma) and 8ug/ml of DEAE-dextran (Sigma). The volume of the lentivirus library used is  
652 the one required for achieving an optimal transduction efficiency, MOI of 0.3 after 5 days selection  
653 with 5ug/ml of puromycin (Sigma). CFSE<sup>hi</sup> and CFSE<sup>lo</sup> Cas9-CD45.1 Marilyn CD4<sup>+</sup> T cells were  
654 sorted and their gDNA extracted using 10μl of lysis buffer-AL (Qiagen-DNeasy blood and tissue  
655 kit), 1μl proteinase K (Qiagen), followed by 30 min incubation at 56°C, 30 min incubation at 95°C  
656 and resuspension in 20μl of ddH2O on ice. The gRNAs were amplified by a two-step PCR method  
657 using the Herculase II Fusion DNA Polymerase (Agilent). For the first step PCR, all the gDNA  
658 extracted is used to perform approximately 30X50-μl PCR reactions with the forward primer 50bp-  
659 F and the reverse primer 50bp-R (Key Resources Table); the PCR program used is 94 ° C for 180 s,  
660 16 cycles of 94 ° C for 30 s, 60 ° C for 10 s and 72 ° C for 25 s, and a final 2-min extension at 68 °  
661 C. Products of the first-step PCR are pooled, purified with Ampure XP (Agencourt) and quantified  
662 using the dsDNA HS assay kit. Three 50-μl PCR reactions were performed with the forward primer  
663 Index-F and one of the reverse primers (Index-R1 to R6). The PCR program used is 94 ° C for 180  
664 s, 18 cycles of 94 ° C for 30 s, 54 ° C for 10 s and 72 ° C for 18 s, and a final 2-min extension at 68  
665 ° C. Products of the second-step PCR reactions were purified and analysed with Caliper Labchip for  
666 DNA samples (HT DNA High Sensitivity LabChip Kit; Perkin Elmer) prior to sequencing with the  
667 Miseq or HiSeq2500 instrument for the library representation (Illumina). The DNA quality was

668 assessed and quantified using an Agilent DNA 1000 series II assay and a Qubit fluorometer  
669 (Invitrogen). Sequencing was performed with a 10% Phix control, using the 25-bp single-end  
670 sequencing protocol preceded by 23 dark cycles to mark the repetitive structure of the target region.

671

### 672 **Bulk mRNA Sequencing and Analysis**

673 Between  $10^4$  and  $3 \cdot 10^4$  murine and human T cells were sorted from lymph nodes and tumors in TCL  
674 buffer (Qiagen) with 1% of  $\beta$ -mercaptoethanol. Total RNA was purified using the Single Cell RNA  
675 purification kit (Norgen) according to the manufacturer's instructions, including a step of DNase  
676 treatment (Qiagen). The RNA integrity number was then evaluated with an Agilent RNA 6000 pico kit.  
677 cDNA synthesis and Illumina-compatible libraries were generated from total RNA (0,25-10ng) by Next  
678 Generation Sequencing platform of the Institut Curie, using SMARTer Stranded Total RNA-Seq Kit-  
679 Pico Input Mammalian according to manufacturer's instructions. Libraries were then sequenced on an  
680 Illumina NovaSeq-S1 using 100bp paired-end mode (OR HiSeq - Rapid Run - PE100). FASTQ files  
681 were mapped to the reference genome hg19 (human) or mm10 (mice) using Hisat2 and counted by  
682 featureCounts from the Subread R package to produce read count tables. EdgeR was then used to  
683 normalize read counts and gene with expression  $> 0.5$  cpm in at least three replicates were kept for  
684 subsequent analysis. Differential gene expression was performed with limma-voom R package. The  
685 fgsea R package was used to compute the enrichment scores. For Affymetrix analysis, gene expression  
686 was conducted using Mouse Clariom D chip (Thermo Fisher). RNA samples were amplified with  
687 Ovation Pico WTA System v2 (Nugen) and labeled with Encore biotin module (Nugen). Array were  
688 hybridized with 5  $\mu$ g of labeled DNA and assayed on a GeneChip Scanner 3000 7G (Affymetrix). Raw  
689 data were generated and controlled with Expression console (Affymetrix) at the Institut Curie Genomic  
690 facility.

### 691 **Genome-wide data processing**

692 FASTQ files obtained after sequencing were demultiplexed using the HiSeq Analysis software  
693 (Illumina). MAGeCK (Li et al., 2014) count command was then used to generate per-sgRNA read count  
694 table by matching single-end reads with sgRNA sequences from the genome-scale sgRNA Yusa library  
695 (Koike-Yusa et al., 2014). Before mapping, the library was first cleansed of (i) all sgRNA that did not

696 map the reference genome (here mm10) and (ii) all sgRNA that mapped multiple spot in the reference  
697 genome (multihits). Redundant sgRNA were merged. A normalizing factor for each sample was then  
698 calculated using Trimmed Mean of M-values (TMM) method implemented in edgeR R package  
699 (Robinson and Oshlack, 2010) Normalized counts were filtered for low expressed sgRNA (keeping only  
700 sgRNA with at least 4 count per million in 3 samples) and transformed to log<sub>2</sub>-counts per million using  
701 voom implemented in limma R package. Differential expression of each sgRNA was calculated using  
702 lmFit function in limma using the high and low CFSE cell fraction from each screen. For each sgRNA,  
703 enriched and depleted p-values were computed using one-tailed paired Student's t-tests. From these,  
704 Robust Rang Aggregation (RRA) score (10.1093/bioinformatics/btr709) for each gene was computed  
705 among multiple sgRNAs (n=5) of each gene and gene-level related p values and corresponding adjusted  
706 p-values [False Discovery Rates (FDR)] were obtained using a permutation test with 1,000,000  
707 iterations with same size randomized gene sets. Finally, graphical representation of genes according to  
708 their enriched p value and median log fold change of sgRNA supporting the RRA score was done.

#### 709 **Cas9-RNP validations**

710 1 µl Oligos crRNA (100nM) and 1µl tracrRNA (100nM) (Key Resources Table) for murine T cells and  
711 1 µl Oligos crRNA1 + 1 µl Oligos crRNA2 + 1 µl Oligos tracrRNA for human T cells were annealed at  
712 95°C for 5min and incubated at room temperature 10 min with 10µg S.p Hifi Cas9 Nuclease V3. 2.10<sup>6</sup>  
713 T cells were resuspended in 20 µl of nucleofection solution with 3 µl or 4 µl RNP and transferred to  
714 Nucleofection cuvette strips (4D-Nucleofector X kit S; Lonza). Murine T cells were electroporated using  
715 the DN110 program of 4D nucleofector (4D-Nucleofector Core Unit: Lonza, AAF-1002B), human CAR  
716 T cells using the program E0115. T cells were then incubated at 32°C for 24 to 48 hours to increase the  
717 mutagenesis efficacy (Doyon et al., 2010), prior to resuspension in supplemented fresh medium. Murine  
718 CD4<sup>+</sup> T cells were maintained in complete RPMI with IL2 (10ng/mL) and IL-7 (2ng/mL). Human T  
719 cells were maintained in X-Vivo with 5% human serum and IL7 (5ng/mL) and IL15 (5ng/mL). Locus-  
720 specific PCRs (Key Resources Table) were performed on genomic DNA and frequencies of NHEJ  
721 mutations were assessed by sequencing (Eurofins, Mix2seq) and TIDE analysis  
722 (<https://tide.deskgen.com>).

#### 723 **Statistical Analysis**

724 One-way ANOVA, two-way ANOVA, or Mann–Whitney non-parametric test with  $p < 0.05$  were  
725 performed using Prism 8.0 software (GraphPad). Multiple comparisons were corrected with the  
726 Bonferroni coefficient and Kaplan–Meier survival curves were compared with the log-rank test.

727

## 728 **Supplemental Information titles and legends**

### 729 **Fig. S1. Establishing and validating *in vivo* Genome-wide pooled CRISPR screens in CD4 T cells,** 730 **related to figure 1.**

731 (A) Percentage (gated on singlets live CD45.1<sup>+</sup> CD4 T cells) of naïve and Antigen-experienced (Ag-  
732 exp) Marilyn-Cas9 cells proliferation *in vivo* 14 days after footpad vaccinations. (B) CD45.1 Marilyn  
733 (V $\beta$ 6<sup>+</sup>) CD4 T cell Cas9 expression phenotype (red) after crossing CD45.1 Marilyn TCR (blue)  
734 transgenic Rag2<sup>-/-</sup> mice to Rosa-26-Cas9-EGFP knock-in mice and activation (CD44), homing (CD62L)  
735 markers in naïve and in Ag-exp Marilyn CD4 T cell (*in vitro* priming and resting) prior to injection. (C)  
736 Representative plots showing transduced Ag-exp Marilyn-Cas9 cell viability and BFP reporter  
737 expression before and after puromycin selection (5 $\mu$ g/mL for 4 days). (D, E) Deep-sequencing analysis  
738 (Hiseq 300 million reads) of the gRNAs in the lentiviral plasmid DNA library (D) and in the genomic  
739 DNA of 45.10<sup>6</sup> transduced Marilyn-Cas9 cells (E). The percentage of sgRNA with read count < 10 are  
740 mentioned in red. (F) SORTing strategy of CFSE<sup>lo</sup> and CFSE<sup>hi</sup> Marilyn-Cas9 library-transduced after *in*  
741 *vivo* selection. (G) Box-dot plot of overall sgRNA library representation in CFSE<sup>hi</sup> and CFSE<sup>lo</sup> sorted  
742 population ex-vivo ( $n=3-6$  mice/group). (H) Dot plot confirming sgSOCS1 enrichment ( $n = 5$  sgRNAs  
743 per gene) in CFSE<sup>lo</sup> subset of CD45.1-library-transduced CD4 T cells compared to the CFSE<sup>hi</sup> subset  
744 without the first cohort (weak selection), from three independent GW screens, two-tailed paired  
745 Student's t-test. (I) Tide analysis showing the percentage of NHEJ-mutations in the genomic DNA  
746 (gDNA) of Ag-exp Marilyn and OT2 cells, 4 days after electroporation with sgSOCS1. (J) SOCS1  
747 protein expression in Ag-exp Marilyn and OT2 cells 6 days after electroporation by western blot  
748 analysis. (K) Representative plots and percentage (gated on singlets live CD90.1<sup>+</sup> CD4 T cells) of  
749 proliferating Ag-exp Mock or sgSOCS1 OT2 cells during a recall response, at day 14. Mice were  
750 injected with 2.10<sup>6</sup> CD4 T cells IV and primed with 10<sup>6</sup> peptide–pulsed LPS-matured DCs at day 0 and  
751 day 7. (L) Representative flow plots showing the percentage of Marilyn and OT2 Tregs

752 (CD25<sup>+</sup>FOXP3<sup>+</sup>) in C57BL/6 mice transferred and vaccinated from Fig.1I and Fig.S1K, at day 14. Data  
753 are shown as mean, analyzed by Mann–Whitney U tests from two (K) or three independent experiments  
754 (H),  $n=2-6$  mice/group.

755 **Fig. S2. Validating SOCS1 as negative feedback node integrating/regulating several lymphokines**  
756 **signals, related to figure2.**

757 (A) Representative flow and percentage of CD25 expression in naive and Ag-exp Marilyn cells in the  
758 course of an ongoing immune response. (B) Representative flow plots showing naive and Ag-exp  
759 Marilyn cells producing IL2 and IFN- $\gamma$  in an ongoing immune response. (C) Representative flow plots  
760 (percentage highlighted are from singlets live CD45.1<sup>+</sup> CD4 T cells) and quantification of 10<sup>6</sup> Ag-exp  
761 Marilyn IFN $\gamma$ -R<sup>-/-</sup> cells expansion *in vivo* during a CD4<sup>+</sup> recall response, in the presence of blocking  
762 antibodies (200 $\mu$ g) injected intraperitoneally at day 7, day 9, day 11: isotypes, anti-IL2R $\beta$ . (D) Flow  
763 cytometric evaluation of CD69, CD25, IRF4 and expressions in sgSOCS1 Ag-exp OT2 cells compared  
764 to Mock cells after overnight co-culture with peptide–pulsed LPS-matured DCs *in vitro*, in the absence  
765 of cytokine. (E) Representative flow plots showing CD25 and IRF4 expressions in Marilyn and OT2  
766 cells mock or sgSOCS1 after overnight coculture with DCs loaded with increasing doses of Dby. (F)  
767 Flow plots and percentage of IFN- $\gamma$ -, TNF $\alpha$ - and IL-2-producing Mock or sgSOCS1 OT2 cells. Data  
768 are shown as mean or mean  $\pm$  SD, analyzed by Mann–Whitney U tests or two-way ANOVA (D), from  
769 two independent experiments  $n=2-3$  mice/group.

770 **Fig. S3. *Socs1* gene inactivation improves Marilyn adoptive cell therapy of male bladder tumors**  
771 **MB49.**

772 (A) Differentially expressed genes in Tumor draining lymph node (TdLN)-infiltrating CD45.1 Marilyn  
773 sgSOCS1 cells compared to Marilyn mock cells. Transcripts with an FDR value <0.05 are highlighted  
774 in light green. (B) Representative flow plots and quantification of CD45.1<sup>+</sup> Marilyn cells in the blood  
775 of MB49-bearing C57BL/6 mice at day 25. (C) Absolute number of polycytokine producing Marilyn  
776 cells in the TdLN at day 7 after transfer. (D) Genes uniquely downregulated in naive vs effector-memory  
777 CD4 T cells (left panel, GSE11057) and upregulated in Tregs vs Tconv in lymph node (LN, right panel,  
778 GSE37532) were evaluated in Marilyn sgSOCS1 versus Marilyn mock in TdLN ( $n = 6$  mice) using  
779 Gene set enrichment analysis. NES: normalized enrichment score. (E) Representative flow plots and



780 quantification of functionally active (PD1<sup>+</sup>, Tim3<sup>+</sup>) CD8 and NK cells from the endogenous  
781 compartment, infiltrating the tumor at day 7. Data are shown as mean, analyzed by Mann–Whitney U  
782 tests from two independent experiments,  $n=4-6$  mice/group.

783 **Fig.S4. *Socs1* gene inactivation in Ag-exp OT1 and OT2 cells, related to figure 4.**

784 (A) TIDE analysis showing the percentage of NHEJ-mutations in the gDNA of OT1 cells, 4 days after  
785 electroporation with sgSOCS1. (B) SOCS1 protein expression in OT1 cells 6 days after electroporation  
786 by western blot analysis. (C) Representative plots, quantification and phenotype of OT2 and OT1 cells  
787 in 50 $\mu$ L of blood from B16-OVA challenged mice at day 60 after tumor challenge. (D) Differentially  
788 expressed genes in tumor-infiltrating CD45.1 OT1 sgSOCS1 cells compared to OT1 mock cells, 14 days  
789 after transfer. Transcripts with an FDR value  $<0.05$  are highlighted in light green. (E) Gene set  
790 enrichment analysis (GSEA) of selected Hallmarks transcriptional signatures (MSigDB) with an FDR  
791 value  $< 0.05$  in Ag-exp OT1 sgSOCS1 versus Ag-exp mock OT1 cells in the tumor ( $n = 3$  replicates  
792 from 2 pooled mice). (F) Genes uniquely upregulated in effector CD8 T cells vs exhausted CD8 T cells  
793 (GSE9650) were assayed in OT1 sgSOCS1 cells vs OT1 Mock cells in tumor at day 14. (G, H) Effector  
794 molecules produced by OT1 sgSOCS1 and OT1 mock cells after overnight co-culture with DCs-loaded  
795 with increasing doses of SIINFKEL peptide *in vitro*, from two independent experiments, analyzed by  
796 two-way ANOVA. Data are shown as mean  $\pm$  SD analyzed by Mann–Whitney U tests from two  
797 independent experiments,  $n=4-6$  mice/group.

798 **Fig. S5. *SOCS1* inactivation improves CAR4 and CAR8 expansion, persistence and functional**  
799 **activity, related to figure 5.**

800 (A) TIDE analysis showing the percentage of NHEJ-mutations in the gDNA of human CD4 (CAR4)  
801 and CD8 CAR T cells (CAR8), 4 days after electroporation with sgSOCS1. (B) SOCS1 protein  
802 expression in CAR4 and CAR8 cells 6 days after electroporation by western blot analysis. (C) Cytotoxic  
803 activity using an 18 h bioluminescence assay, using firefly luciferase (FFL)-expressing NALM-6  
804 (NALM6-Luc) as targets cells ( $n = 3$  healthy donors). (D, E) Flow plots and quantification depicting  
805 CAR4 and CAR8 mock and sgSOCS1 effector molecules produced after overnight co-culture with  
806 NALM6-Luc ALL cells ( $n=3$  donors). (F) Genes uniquely downregulated in naïve vs effector CD8 T  
807 cells (top panel, KAECH) and upregulated in effector CD8 T cells (Teff) vs exhausted CD8 T cells



808 (Texh) (bottom panel, GSE41867) were assayed in CAR8 sgSOCS1 versus CAR8 mock ( $n = 6$  mice)  
809 using Gene set enrichment analysis. (G) Representative flow plots (day 28) and quantification of  
810 NALM6-Luc cells infiltrating NSG mice 7 days and 28 days after CAR transfer, gated on singlets live  
811 HLA-I<sup>+</sup>, CD45.2<sup>-</sup> mouse cells ( $2 \cdot 10^6$  mock CAR4/CAR8 or  $2 \cdot 10^6$  sgSOCS1 CAR4/CAR8). (H) Mock  
812 CAR4/CAR8 and sgSOCS1 CAR4/CAR8 infiltration in NSG mice spleen, 28 days after transfer, gated  
813 on live HLA-I<sup>+</sup>, CD45.2<sup>-</sup> mouse cells. (I) Number of CAR4 and CAR8 producing effectors molecules  
814 from the bone marrow at day 28 *ex vivo*. (J) Representative flow plots and quantification of negative  
815 checkpoints expressed by CAR4/CAR8 cells in the bone marrow of NALM6-Luc transferred NSG mice  
816 at day 28 ( $n = 6$  mice). Data are represented as means or mean  $\pm$  SD, analyzed by Mann–Whitney U  
817 tests, from three independent experiments (A-E) or two independent experiments (F-J).

## 818 References

- 819 Adusumilli, P.S., Cherkassky, L., Villena-Vargas, J., Colovos, C., Servais, E., Plotkin, J., Jones, D.R.,  
820 and Sadelain, M. (2014). Regional delivery of mesothelin-targeted CAR T cell therapy generates  
821 potent and long-lasting CD4-dependent tumor immunity. *Sci Transl Med* 6, 261ra151.  
822 Akkaya, B., Oya, Y., Akkaya, M., Al Souz, J., Holstein, A.H., Kamenyeva, O., Kabat, J., Matsumura,  
823 R., Dorward, D.W., Glass, D.D., et al. (2019). Regulatory T cells mediate specific suppression by  
824 depleting peptide-MHC class II from dendritic cells. *Nat. Immunol.* 20, 218–231.  
825 Albrecht, I., Niesner, U., Janke, M., Menning, A., Loddenkemper, C., Köhl, A.A., Lepenies, I.,  
826 Lexberg, M.H., Westendorf, K., Hradilkova, K., et al. (2010). Persistence of effector memory Th1  
827 cells is regulated by Hopx. *Eur. J. Immunol.* 40, 2993–3006.  
828 Alexander, W.S., Starr, R., Fenner, J.E., Scott, C.L., Handman, E., Sprigg, N.S., Corbin, J.E., Cornish,  
829 A.L., Darwiche, R., Owczarek, C.M., et al. (1999). SOCS1 is a critical inhibitor of interferon gamma  
830 signaling and prevents the potentially fatal neonatal actions of this cytokine. *Cell* 98, 597–608.  
831 Alonso, R., Flament, H., Lemoine, S., Sedlik, C., Bottasso, E., Péguillet, I., Prémel, V., Denizeau, J.,  
832 Salou, M., Darbois, A., et al. (2018). Induction of anergic or regulatory tumor-specific CD4<sup>+</sup> T cells in  
833 the tumor-draining lymph node. *Nat Commun* 9, 2113.  
834 Balaji, K.N., Schaschke, N., Machleidt, W., Catalfamo, M., and Henkart, P.A. (2002). Surface  
835 cathepsin B protects cytotoxic lymphocytes from self-destruction after degranulation. *J. Exp. Med.*  
836 196, 493–503.  
837 Berner, V., Liu, H., Zhou, Q., Alderson, K.L., Sun, K., Weiss, J.M., Back, T.C., Longo, D.L., Blazar,  
838 B.R., Wiltout, R.H., et al. (2007). IFN-gamma mediates CD4<sup>+</sup> T-cell loss and impairs secondary  
839 antitumor responses after successful initial immunotherapy. *Nat. Med.* 13, 354–360.  
840 Borst, J., Ahrends, T., Bąbała, N., Melief, C.J.M., and Kastenmüller, W. (2018). CD4<sup>+</sup> T cell help in  
841 cancer immunology and immunotherapy. *Nat. Rev. Immunol.* 18, 635–647.  
842 Bos, R., and Sherman, L.A. (2010). CD4<sup>+</sup> T-cell help in the tumor milieu is required for recruitment  
843 and cytolytic function of CD8<sup>+</sup> T lymphocytes. *Cancer Res.* 70, 8368–8377.  
844 Brentjens, R.J., Latouche, J.-B., Santos, E., Marti, F., Gong, M.C., Lyddane, C., King, P.D., Larson,  
845 S., Weiss, M., Rivière, I., et al. (2003). Eradication of systemic B-cell tumors by genetically targeted  
846 human T lymphocytes co-stimulated by CD80 and interleukin-15. *Nat. Med.* 9, 279–286.  
847 Carlson, C.M., Endrizzi, B.T., Wu, J., Ding, X., Weinreich, M.A., Walsh, E.R., Wani, M.A., Lingrel,  
848 J.B., Hogquist, K.A., and Jameson, S.C. (2006). Kruppel-like factor 2 regulates thymocyte and T-cell  
849 migration. *Nature* 442, 299–302.  
850 Chen, S., Sanjana, N.E., Zheng, K., Shalem, O., Lee, K., Shi, X., Scott, D.A., Song, J., Pan, J.Q.,

- 851 Weissleder, R., et al. (2015). Genome-wide CRISPR screen in a mouse model of tumor growth and  
852 metastasis. *Cell* *160*, 1246–1260.
- 853 Corthay, A., Skovseth, D.K., Lundin, K.U., Røsjø, E., Omholt, H., Hofgaard, P.O., Haraldsen, G., and  
854 Bogen, B. (2005). Primary antitumor immune response mediated by CD4+ T cells. *Immunity* *22*, 371–  
855 383.
- 856 Diehl, S., Anguita, J., Hoffmeyer, A., Zapton, T., Ihle, J.N., Fikrig, E., and Rincón, M. (2000).  
857 Inhibition of Th1 differentiation by IL-6 is mediated by SOCS1. *Immunity* *13*, 805–815.
- 858 Ding, H., and Wu, T. (2018). Insulin-Like Growth Factor Binding Proteins in Autoimmune Diseases.  
859 *Front Endocrinol (Lausanne)* *9*, 499.
- 860 Dobrzanski, M.J. (2013). Expanding roles for CD4 T cells and their subpopulations in tumor immunity  
861 and therapy. *Front Oncol* *3*, 63.
- 862 Doyon, Y., Choi, V.M., Xia, D.F., Vo, T.D., Gregory, P.D., and Holmes, M.C. (2010). Transient cold  
863 shock enhances zinc-finger nuclease-mediated gene disruption. *Nat. Methods* *7*, 459–460.
- 864 Egwuagu, C.E., Yu, C.-R., Zhang, M., Mahdi, R.M., Kim, S.J., and Gery, I. (2002). Suppressors of  
865 cytokine signaling proteins are differentially expressed in Th1 and Th2 cells: implications for Th cell  
866 lineage commitment and maintenance. *J. Immunol.* *168*, 3181–3187.
- 867 Foulds, K.E., Zenewicz, L.A., Shedlock, D.J., Jiang, J., Troy, A.E., and Shen, H. (2002). Cutting edge:  
868 CD4 and CD8 T cells are intrinsically different in their proliferative responses. *J. Immunol.* *168*,  
869 1528–1532.
- 870 Gagou, M.E., Ganesh, A., Thompson, R., Phear, G., Sanders, C., and Meuth, M. (2011). Suppression  
871 of apoptosis by PIF1 helicase in human tumor cells. *Cancer Res.* *71*, 4998–5008.
- 872 Guedan, S., Posey, A.D., Shaw, C., Wing, A., Da, T., Patel, P.R., McGettigan, S.E., Casado-Medrano,  
873 V., Kawalekar, O.U., Uribe-Herranz, M., et al. (2018). Enhancing CAR T cell persistence through  
874 ICOS and 4-1BB costimulation. *JCI Insight* *3*.
- 875 Guinn, Z., Lampe, A.T., Brown, D.M., and Petro, T.M. (2016). Significant role for IRF3 in both T cell  
876 and APC effector functions during T cell responses. *Cell. Immunol.* *310*, 141–149.
- 877 Helft, J., Jacquet, A., Joncker, N.T., Grandjean, I., Dorothée, G., Kissenpfennig, A., Malissen, B.,  
878 Matzinger, P., and Lantz, O. (2008). Antigen-specific T-T interactions regulate CD4 T-cell expansion.  
879 *Blood* *112*, 1249–1258.
- 880 Hildeman, D.A., Zhu, Y., Mitchell, T.C., Bouillet, P., Strasser, A., Kappler, J., and Marrack, P. (2002).  
881 Activated T cell death in vivo mediated by proapoptotic bcl-2 family member bim. *Immunity* *16*, 759–  
882 767.
- 883 Homann, D., Teyton, L., and Oldstone, M.B. (2001). Differential regulation of antiviral T-cell  
884 immunity results in stable CD8+ but declining CD4+ T-cell memory. *Nat. Med.* *7*, 913–919.
- 885 Kagoya, Y., Tanaka, S., Guo, T., Anczurowski, M., Wang, C.-H., Saso, K., Butler, M.O., Minden,  
886 M.D., and Hirano, N. (2018). A novel chimeric antigen receptor containing a JAK-STAT signaling  
887 domain mediates superior antitumor effects. *Nat. Med.* *24*, 352–359.
- 888 Kitano, S., Tsuji, T., Liu, C., Hirschhorn-Cymerman, D., Kyi, C., Mu, Z., Allison, J.P., Gnjjatic, S.,  
889 Yuan, J.D., and Wolchok, J.D. (2013). Enhancement of tumor-reactive cytotoxic CD4+ T cell  
890 responses after ipilimumab treatment in four advanced melanoma patients. *Cancer Immunol Res* *1*,  
891 235–244.
- 892 Knudson, K.M., Pritzl, C.J., Saxena, V., Altman, A., Daniels, M.A., and Teixeira, E. (2017). NFκB-  
893 Pim-1-Eomesodermin axis is critical for maintaining CD8 T-cell memory quality. *Proc. Natl. Acad.*  
894 *Sci. U.S.A.* *114*, E1659–E1667.
- 895 Koike-Yusa, H., Li, Y., Tan, E.-P., Velasco-Herrera, M.D.C., and Yusa, K. (2014). Genome-wide  
896 recessive genetic screening in mammalian cells with a lentiviral CRISPR-guide RNA library. *Nat.*  
897 *Biotechnol.* *32*, 267–273.
- 898 Krapp, C., Hotter, D., Gawanbacht, A., McLaren, P.J., Kluge, S.F., Stürzel, C.M., Mack, K., Reith, E.,  
899 Engelhart, S., Ciuffi, A., et al. (2016). Guanylate Binding Protein (GBP) 5 Is an Interferon-Inducible  
900 Inhibitor of HIV-1 Infectivity. *Cell Host Microbe* *19*, 504–514.
- 901 Lantz, O., Grandjean, I., Matzinger, P., and Di Santo, J.P. (2000). Gamma chain required for naïve  
902 CD4+ T cell survival but not for antigen proliferation. *Nat. Immunol.* *1*, 54–58.
- 903 Lenardo, M.J. (1991). Interleukin-2 programs mouse alpha beta T lymphocytes for apoptosis. *Nature*  
904 *353*, 858–861.
- 905 Li, H., van der Leun, A.M., Yofe, I., Lubling, Y., Gelbard-Solodkin, D., van Akkooi, A.C.J., van den

- 906 Braber, M., Rozeman, E.A., Haanen, J.B.A.G., Blank, C.U., et al. (2019). Dysfunctional CD8 T Cells  
907 Form a Proliferative, Dynamically Regulated Compartment within Human Melanoma. *Cell* *176*, 775-  
908 789.e18.
- 909 Li, W., Xu, H., Xiao, T., Cong, L., Love, M.I., Zhang, F., Irizarry, R.A., Liu, J.S., Brown, M., and Liu,  
910 X.S. (2014). MAGECK enables robust identification of essential genes from genome-scale  
911 CRISPR/Cas9 knockout screens. *Genome Biol.* *15*, 554.
- 912 Liao, N.P.D., Laktyushin, A., Lucet, I.S., Murphy, J.M., Yao, S., Whitlock, E., Callaghan, K., Nicola,  
913 N.A., Kershaw, N.J., and Babon, J.J. (2018). The molecular basis of JAK/STAT inhibition by SOCS1.  
914 *Nat Commun* *9*, 1558.
- 915 Lim, W.A., and June, C.H. (2017). The Principles of Engineering Immune Cells to Treat Cancer. *Cell*  
916 *168*, 724–740.
- 917 Linnemann, C., Schumacher, T.N.M., and Bendle, G.M. (2011). T-cell receptor gene therapy: critical  
918 parameters for clinical success. *J. Invest. Dermatol.* *131*, 1806–1816.
- 919 Lucibello, F., Menegatti, S., and Menger, L. (2020). Methods to edit T cells for cancer  
920 immunotherapy. *Meth. Enzymol.* *631*, 107–135.
- 921 MacLeod, M.K.L., Kappler, J.W., and Marrack, P. (2010). Memory CD4 T cells: generation,  
922 reactivation and re-assignment. *Immunology* *130*, 10–15.
- 923 Mahnke, J., Schumacher, V., Ahrens, S., Käding, N., Feldhoff, L.M., Huber, M., Rupp, J.,  
924 Raczkowski, F., and Mittrücker, H.-W. (2016). Interferon Regulatory Factor 4 controls TH1 cell  
925 effector function and metabolism. *Sci Rep* *6*, 35521.
- 926 Majri, S.S., Fritz, J.M., Villarino, A.V., Zheng, L., Kanellopoulou, C., Chaigne-Delalande, B.,  
927 Grönholm, J., Niemela, J.E., Afzali, B., Biancalana, M., et al. (2018). STAT5B: A Differential  
928 Regulator of the Life and Death of CD4+ Effector Memory T Cells. *J. Immunol.* *200*, 110–118.
- 929 Markley, J.C., and Sadelain, M. (2010). IL-7 and IL-21 are superior to IL-2 and IL-15 in promoting  
930 human T cell-mediated rejection of systemic lymphoma in immunodeficient mice. *Blood* *115*, 3508–  
931 3519.
- 932 Merica, R., Khoruts, A., Pape, K.A., Reinhardt, R.L., and Jenkins, M.K. (2000). Antigen-experienced  
933 CD4 T cells display a reduced capacity for clonal expansion in vivo that is imposed by factors present  
934 in the immune host. *J. Immunol.* *164*, 4551–4557.
- 935 Michalska, A., Blaszczyk, K., Wesoly, J., and Bluysen, H.A.R. (2018). A Positive Feedback  
936 Amplifier Circuit That Regulates Interferon (IFN)-Stimulated Gene Expression and Controls Type I  
937 and Type II IFN Responses. *Front Immunol* *9*, 1135.
- 938 Monteverde, T., Tait-Mulder, J., Hedley, A., Knight, J.R., Sansom, O.J., and Murphy, D.J. (2018).  
939 Calcium signalling links MYC to NUA1. *Oncogene* *37*, 982–992.
- 940 O’Leary, C.E., Riling, C.R., Spruce, L.A., Ding, H., Kumar, S., Deng, G., Liu, Y., Seeholzer, S.H.,  
941 and Oliver, P.M. (2016). Ndfip-mediated degradation of Jak1 tunes cytokine signalling to limit  
942 expansion of CD4+ effector T cells. *Nat Commun* *7*, 11226.
- 943 Patil, V.S., Madrigal, A., Schmiedel, B.J., Clarke, J., O’Rourke, P., de Silva, A.D., Harris, E., Peters,  
944 B., Seumois, G., Weiskopf, D., et al. (2018). Precursors of human CD4+ cytotoxic T lymphocytes  
945 identified by single-cell transcriptome analysis. *Sci Immunol* *3*.
- 946 Quezada, S.A., Simpson, T.R., Peggs, K.S., Merghoub, T., Vider, J., Fan, X., Blasberg, R., Yagita, H.,  
947 Muranski, P., Antony, P.A., et al. (2010). Tumor-reactive CD4(+) T cells develop cytotoxic activity  
948 and eradicate large established melanoma after transfer into lymphopenic hosts. *J. Exp. Med.* *207*,  
949 637–650.
- 950 Quintarelli, C., Vera, J.F., Savoldo, B., Giordano Attianese, G.M.P., Pule, M., Foster, A.E., Heslop,  
951 H.E., Rooney, C.M., Brenner, M.K., and Dotti, G. (2007). Co-expression of cytokine and suicide  
952 genes to enhance the activity and safety of tumor-specific cytotoxic T lymphocytes. *Blood* *110*, 2793–  
953 2802.
- 954 Rabin, R.L., Alston, M.A., Sircus, J.C., Knollmann-Ritschel, B., Moratz, C., Ngo, D., and Farber, J.M.  
955 (2003). CXCR3 is induced early on the pathway of CD4+ T cell differentiation and bridges central and  
956 peripheral functions. *J. Immunol.* *171*, 2812–2824.
- 957 Ravkov, E.V., and Williams, M.A. (2009). The magnitude of CD4+ T cell recall responses is  
958 controlled by the duration of the secondary stimulus. *J. Immunol.* *183*, 2382–2389.
- 959 Ren, B., Cam, H., Takahashi, Y., Volkert, T., Terragni, J., Young, R.A., and Dynlacht, B.D. (2002).  
960 E2F integrates cell cycle progression with DNA repair, replication, and G(2)/M checkpoints. *Genes*

- 961 Dev. 16, 245–256.
- 962 Robinson, M.D., and Oshlack, A. (2010). A scaling normalization method for differential expression  
963 analysis of RNA-seq data. *Genome Biol.* 11, R25.
- 964 Robinson, A., Meredith, C., and Austen, B.M. (1986). Isolation and properties of the signal region  
965 from ovalbumin. *FEBS Lett.* 203, 243–246.
- 966 Sadelain, M. (2015). CAR therapy: the CD19 paradigm. *J. Clin. Invest.* 125, 3392–3400.
- 967 Sckisel, G.D., Bouchlaka, M.N., Monjazez, A.M., Crittenden, M., Curti, B.D., Wilkins, D.E.C.,  
968 Alderson, K.A., Sungur, C.M., Ames, E., Mirsoian, A., et al. (2015). Out-of-Sequence Signal 3  
969 Paralyzes Primary CD4(+) T-Cell-Dependent Immunity. *Immunity* 43, 240–250.
- 970 Seder, R.A., and Ahmed, R. (2003). Similarities and differences in CD4+ and CD8+ effector and  
971 memory T cell generation. *Nat. Immunol.* 4, 835–842.
- 972 Seki, A., and Rutz, S. (2018). Optimized RNP transfection for highly efficient CRISPR/Cas9-mediated  
973 gene knockout in primary T cells. *J. Exp. Med.* 215, 985–997.
- 974 Sledzińska, A., Vila de Mucha, M., Bergerhoff, K., Hotblack, A., Demane, D.F., Ghorani, E., Akarca,  
975 A.U., Marzolini, M.A.V., Solomon, I., Vargas, F.A., et al. (2020). Regulatory T Cells Restrain  
976 Interleukin-2- and Blimp-1-Dependent Acquisition of Cytotoxic Function by CD4+ T Cells. *Immunity*  
977 52, 151-166.e6.
- 978 Sporri, B., Kovanen, P.E., Sasaki, A., Yoshimura, A., and Leonard, W.J. (2001). JAB/SOCS1/SSI-1 is  
979 an interleukin-2-induced inhibitor of IL-2 signaling. *Blood* 97, 221–226.
- 980 Sukka-Ganesh, B., and Larkin, J. (2016a). Therapeutic Potential for Targeting the Suppressor of  
981 Cytokine Signalling-1 Pathway for the Treatment of SLE. *Scand. J. Immunol.* 84, 299–309.
- 982 Sukka-Ganesh, B., and Larkin, J. (2016b). Therapeutic Potential for Targeting the Suppressor of  
983 Cytokine Signalling-1 Pathway for the Treatment of SLE. *Scand. J. Immunol.* 84, 299–309.
- 984 Takahashi, R., Nishimoto, S., Muto, G., Sekiya, T., Tamiya, T., Kimura, A., Morita, R., Asakawa, M.,  
985 Chinen, T., and Yoshimura, A. (2011). SOCS1 is essential for regulatory T cell functions by  
986 preventing loss of Foxp3 expression as well as IFN- $\gamma$  and IL-17A production. *J. Exp. Med.*  
987 208, 2055–2067.
- 988 Takahashi, R., Nakatsukasa, H., Shiozawa, S., and Yoshimura, A. (2017). SOCS1 Is a Key Molecule  
989 That Prevents Regulatory T Cell Plasticity under Inflammatory Conditions. *J. Immunol.* 199, 149–158.
- 990 Teijaro, J.R., Ng, C., Lee, A.M., Sullivan, B.M., Sheehan, K.C.F., Welch, M., Schreiber, R.D., de la  
991 Torre, J.C., and Oldstone, M.B.A. (2013). Persistent LCMV infection is controlled by blockade of  
992 type I interferon signaling. *Science* 340, 207–211.
- 993 Turtle, C.J., Hanafi, L.-A., Berger, C., Gooley, T.A., Cherian, S., Hudecek, M., Sommermeyer, D.,  
994 Melville, K., Pender, B., Budiarto, T.M., et al. (2016). CD19 CAR-T cells of defined CD4+:CD8+  
995 composition in adult B cell ALL patients. *J. Clin. Invest.* 126, 2123–2138.
- 996 Tzelenis, K., Koike-Yusa, H., De Braekeleer, E., Li, Y., Metzakopian, E., Dovey, O.M., Mupo, A.,  
997 Grinkevich, V., Li, M., Mazan, M., et al. (2016). A CRISPR Dropout Screen Identifies Genetic  
998 Vulnerabilities and Therapeutic Targets in Acute Myeloid Leukemia. *Cell Rep* 17, 1193–1205.
- 999 Wang, T., Huang, C., Lopez-Coral, A., Slentz-Kesler, K.A., Xiao, M., Wherry, E.J., and Kaufman,  
1000 R.E. (2012). K12/SECTM1, an interferon- $\gamma$  regulated molecule, synergizes with CD28 to costimulate  
1001 human T cell proliferation. *J. Leukoc. Biol.* 91, 449–459.
- 1002 Wherry, E.J., and Kurachi, M. (2015). Molecular and cellular insights into T cell exhaustion. *Nat. Rev.*  
1003 *Immunol.* 15, 486–499.
- 1004 Wilson, E.B., Yamada, D.H., Elsaesser, H., Herskovitz, J., Deng, J., Cheng, G., Aronow, B.J., Karp,  
1005 C.L., and Brooks, D.G. (2013). Blockade of chronic type I interferon signaling to control persistent  
1006 LCMV infection. *Science* 340, 202–207.
- 1007 Wilson, T.J., Presti, R.M., Tassi, I., Overton, E.T., Cella, M., and Colonna, M. (2007). FcRL6, a new  
1008 ITIM-bearing receptor on cytolytic cells, is broadly expressed by lymphocytes following HIV-1  
1009 infection. *Blood* 109, 3786–3793.
- 1010 Wu, J., Zhang, H., Shi, X., Xiao, X., Fan, Y., Minze, L.J., Wang, J., Ghobrial, R.M., Xia, J.,  
1011 Sciammas, R., et al. (2017). Ablation of Transcription Factor IRF4 Promotes Transplant Acceptance  
1012 by Driving Allogeneic CD4+ T Cell Dysfunction. *Immunity* 47, 1114-1128.e6.
- 1013 Xie, Y., Akpınarlı, A., Maris, C., Hipkiss, E.L., Lane, M., Kwon, E.-K.M., Muranski, P., Restifo, N.P.,  
1014 and Antony, P.A. (2010). Naive tumor-specific CD4(+) T cells differentiated in vivo eradicate  
1015 established melanoma. *J. Exp. Med.* 207, 651–667.



1016 Yang, Y., Kohler, M.E., Chien, C.D., Sauter, C.T., Jacoby, E., Yan, C., Hu, Y., Wanhainen, K., Qin,  
1017 H., and Fry, T.J. (2017a). TCR engagement negatively affects CD8 but not CD4 CAR T cell  
1018 expansion and leukemic clearance. *Sci Transl Med* 9.  
1019 Yang, Y., Kohler, M.E., Chien, C.D., Sauter, C.T., Jacoby, E., Yan, C., Hu, Y., Wanhainen, K., Qin,  
1020 H., and Fry, T.J. (2017b). TCR engagement negatively affects CD8 but not CD4 CAR T cell  
1021 expansion and leukemic clearance. *Sci Transl Med* 9.  
1022 Zander, R., Schauder, D., Xin, G., Nguyen, C., Wu, X., Zajac, A., and Cui, W. (2019). CD4+ T Cell  
1023 Help Is Required for the Formation of a Cytolytic CD8+ T Cell Subset that Protects against Chronic  
1024 Infection and Cancer. *Immunity* 51, 1028-1042.e4.  
1025 Zhou, X., and Xue, H.-H. (2012). Cutting edge: generation of memory precursors and functional  
1026 memory CD8+ T cells depends on T cell factor-1 and lymphoid enhancer-binding factor-1. *J.*  
1027 *Immunol.* 189, 2722–2726.  
1028 Zhu, J.W., Field, S.J., Gore, L., Thompson, M., Yang, H., Fujiwara, Y., Cardiff, R.D., Greenberg, M.,  
1029 Orkin, S.H., and DeGregori, J. (2001). E2F1 and E2F2 determine thresholds for antigen-induced T-  
1030 cell proliferation and suppress tumorigenesis. *Mol. Cell. Biol.* 21, 8547–8564.  
1031 Zhu, Z., Cuss, S.M., Singh, V., Gurusamy, D., Shoe, J.L., Leighty, R., Bronte, V., and Hurwitz, A.A.  
1032 (2015). CD4+ T Cell Help Selectively Enhances High-Avidity Tumor Antigen-Specific CD8+ T Cells.  
1033 *J. Immunol.* 195, 3482–3489.  
1034  
1035

1036 **Figures**

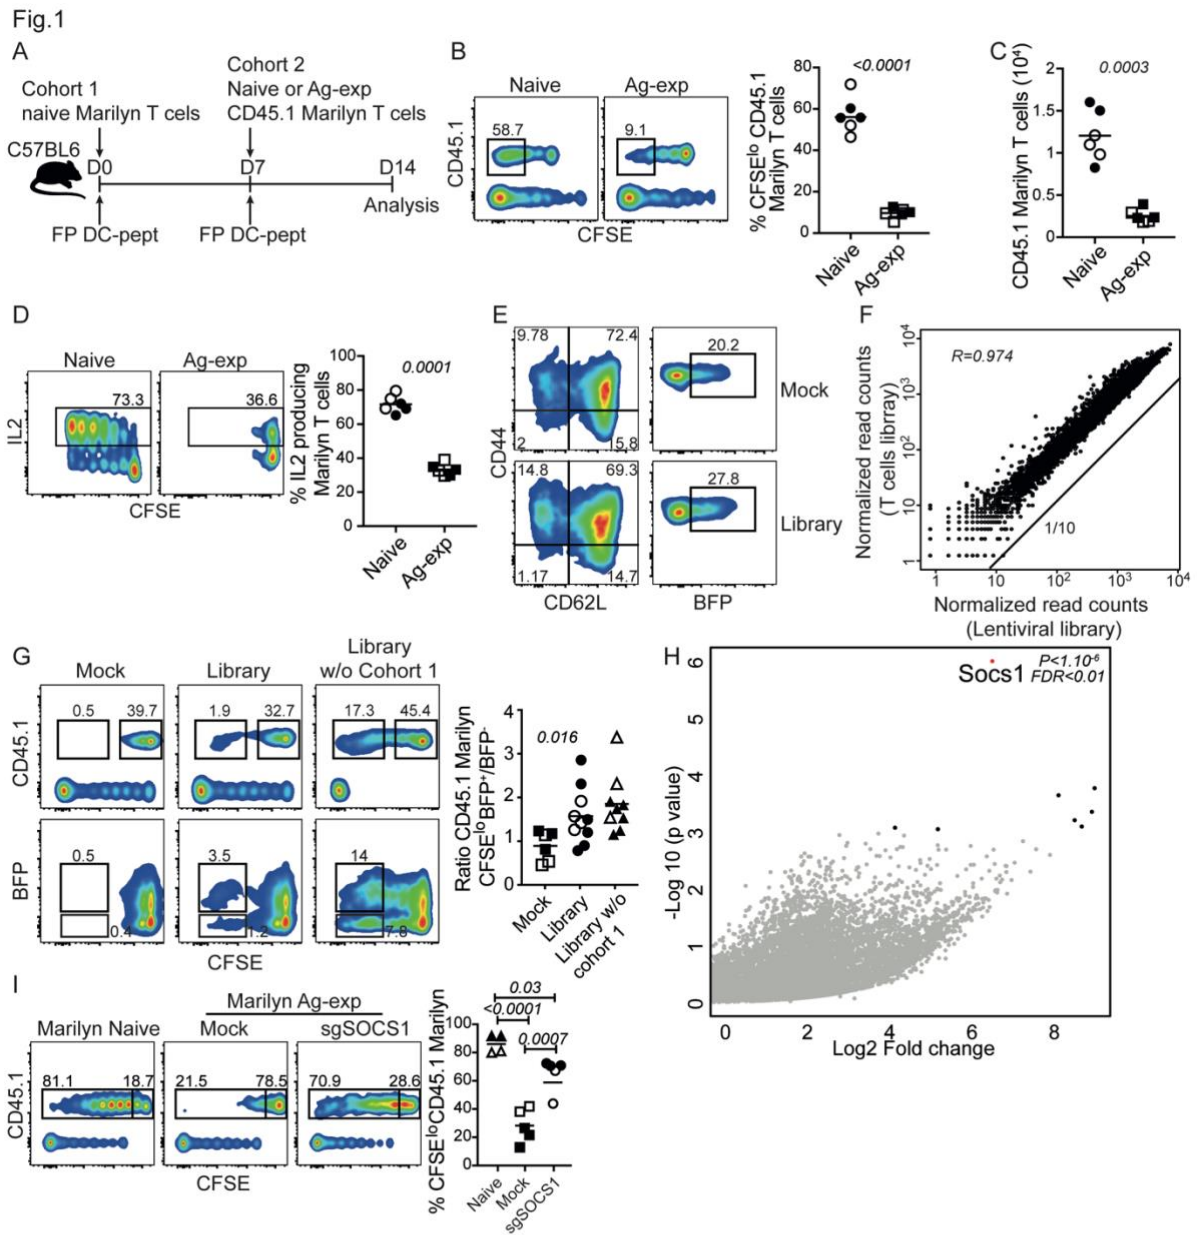

1037

1038

**Figure 1**

Fig. 2

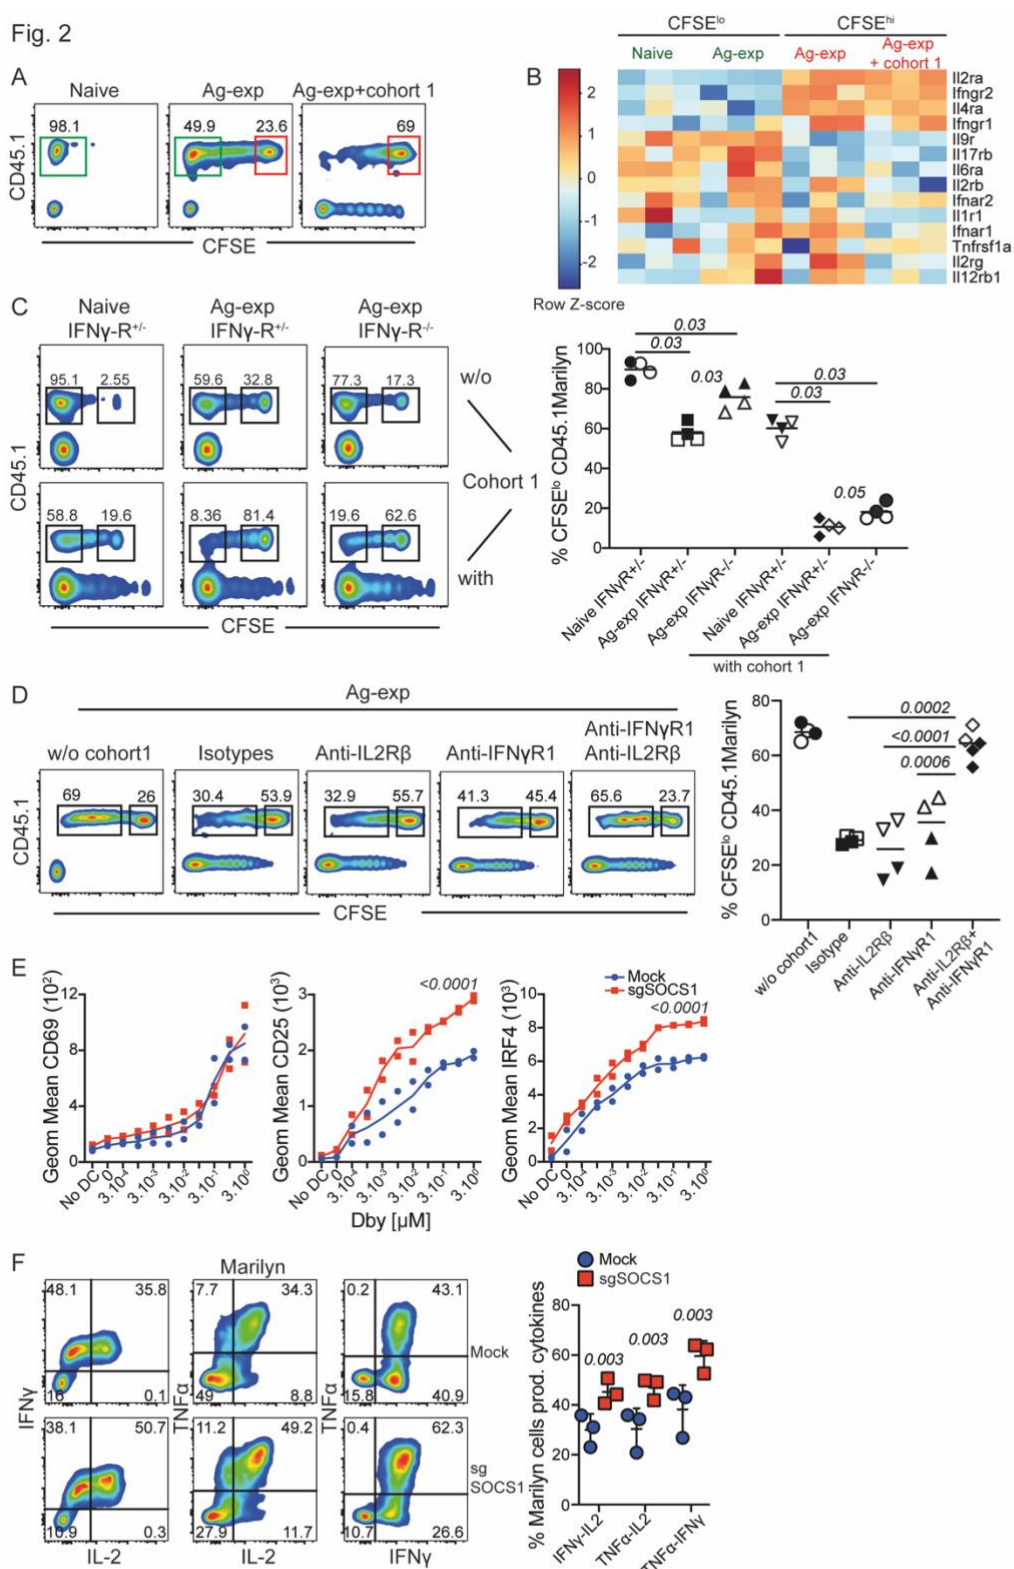

1039

1040

Figure 2



Fig. 3

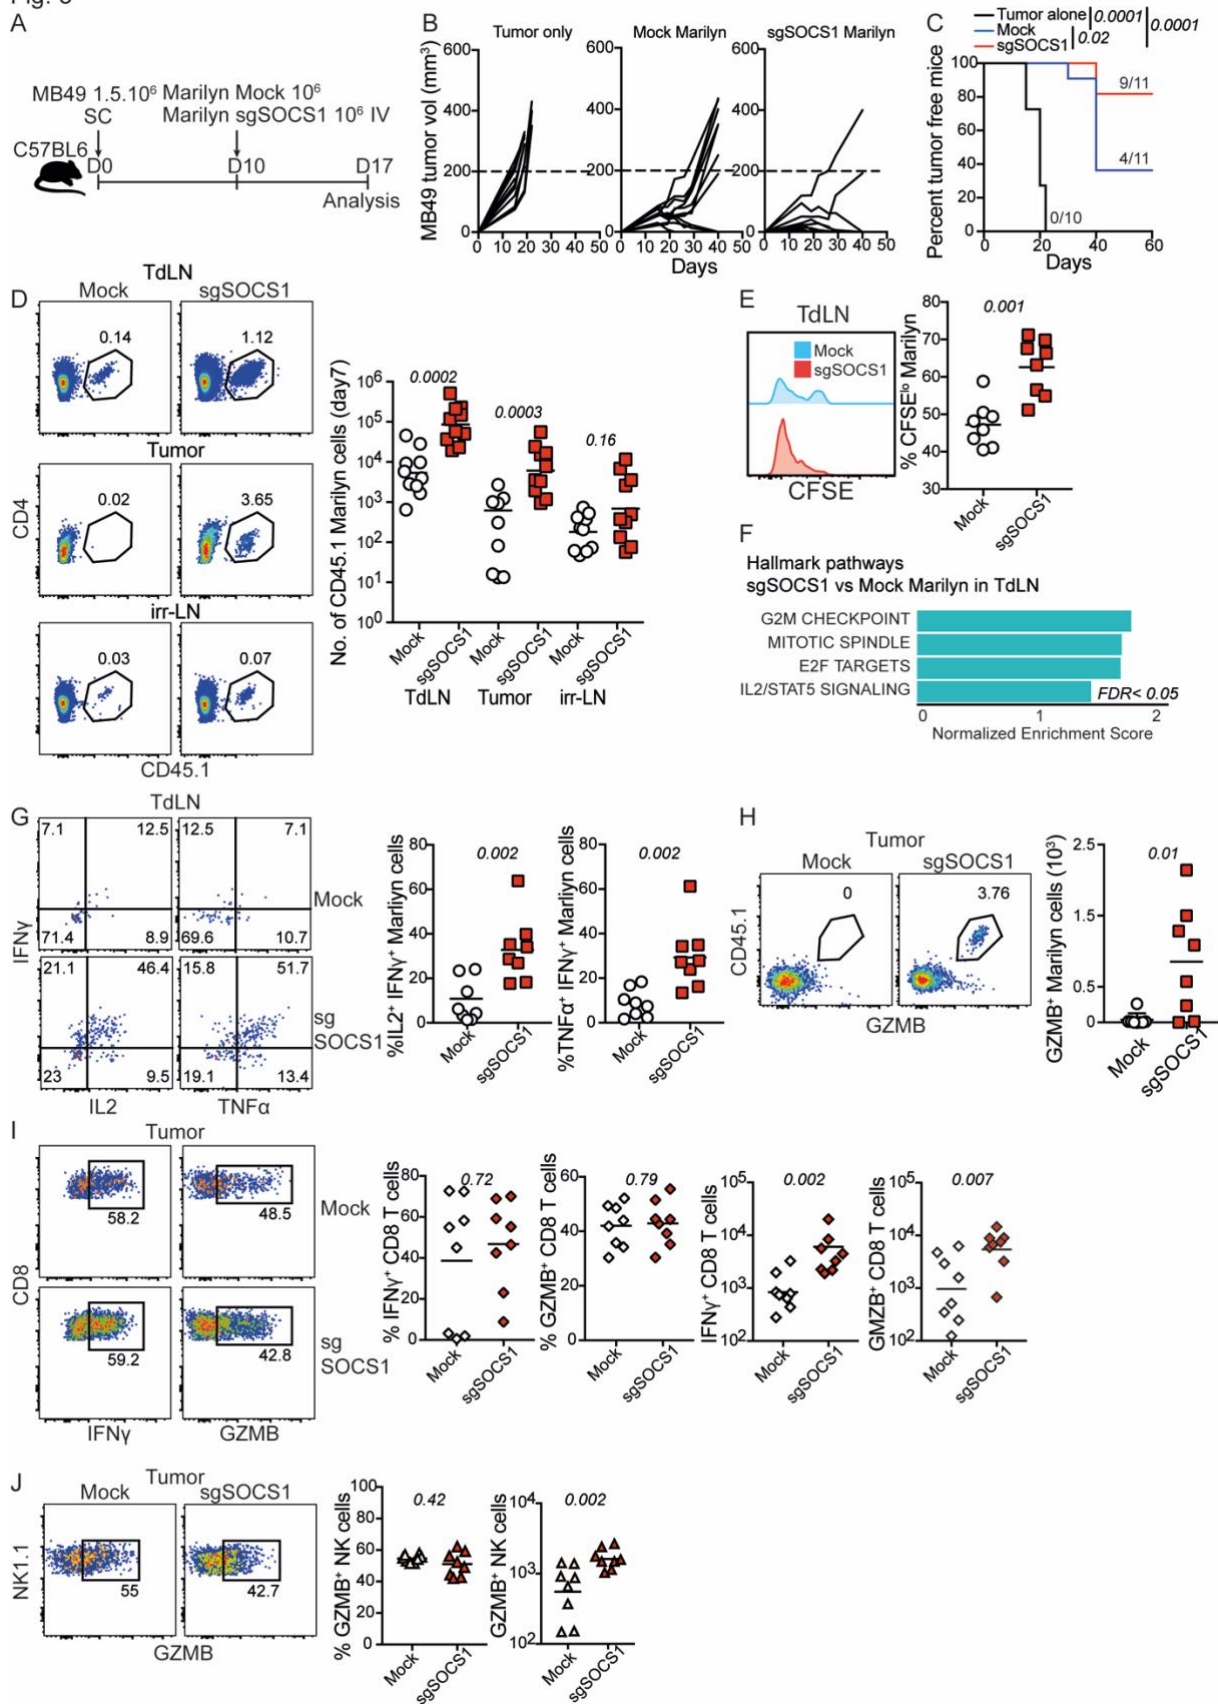

1041

1042

1043

Figure 3

Fig. 4

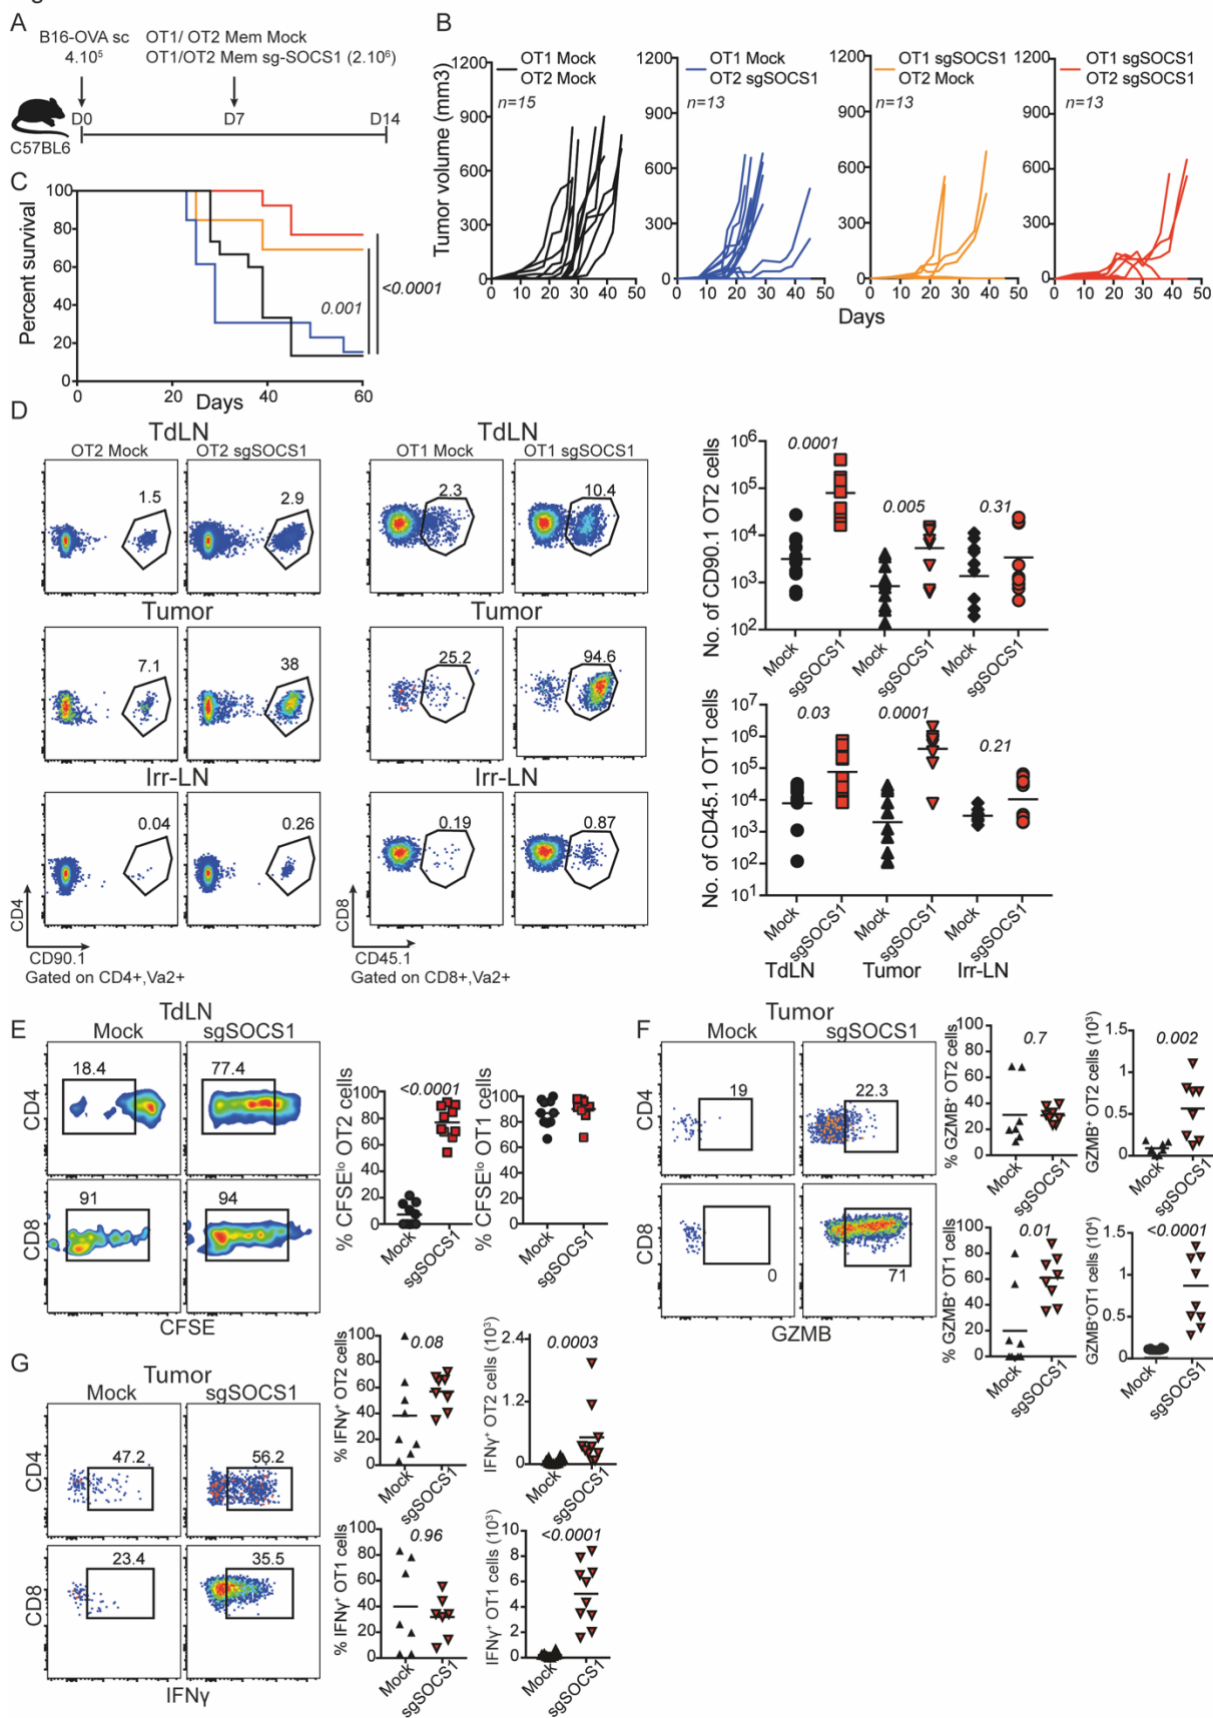

1044  
1045

Figure 4

Fig.5

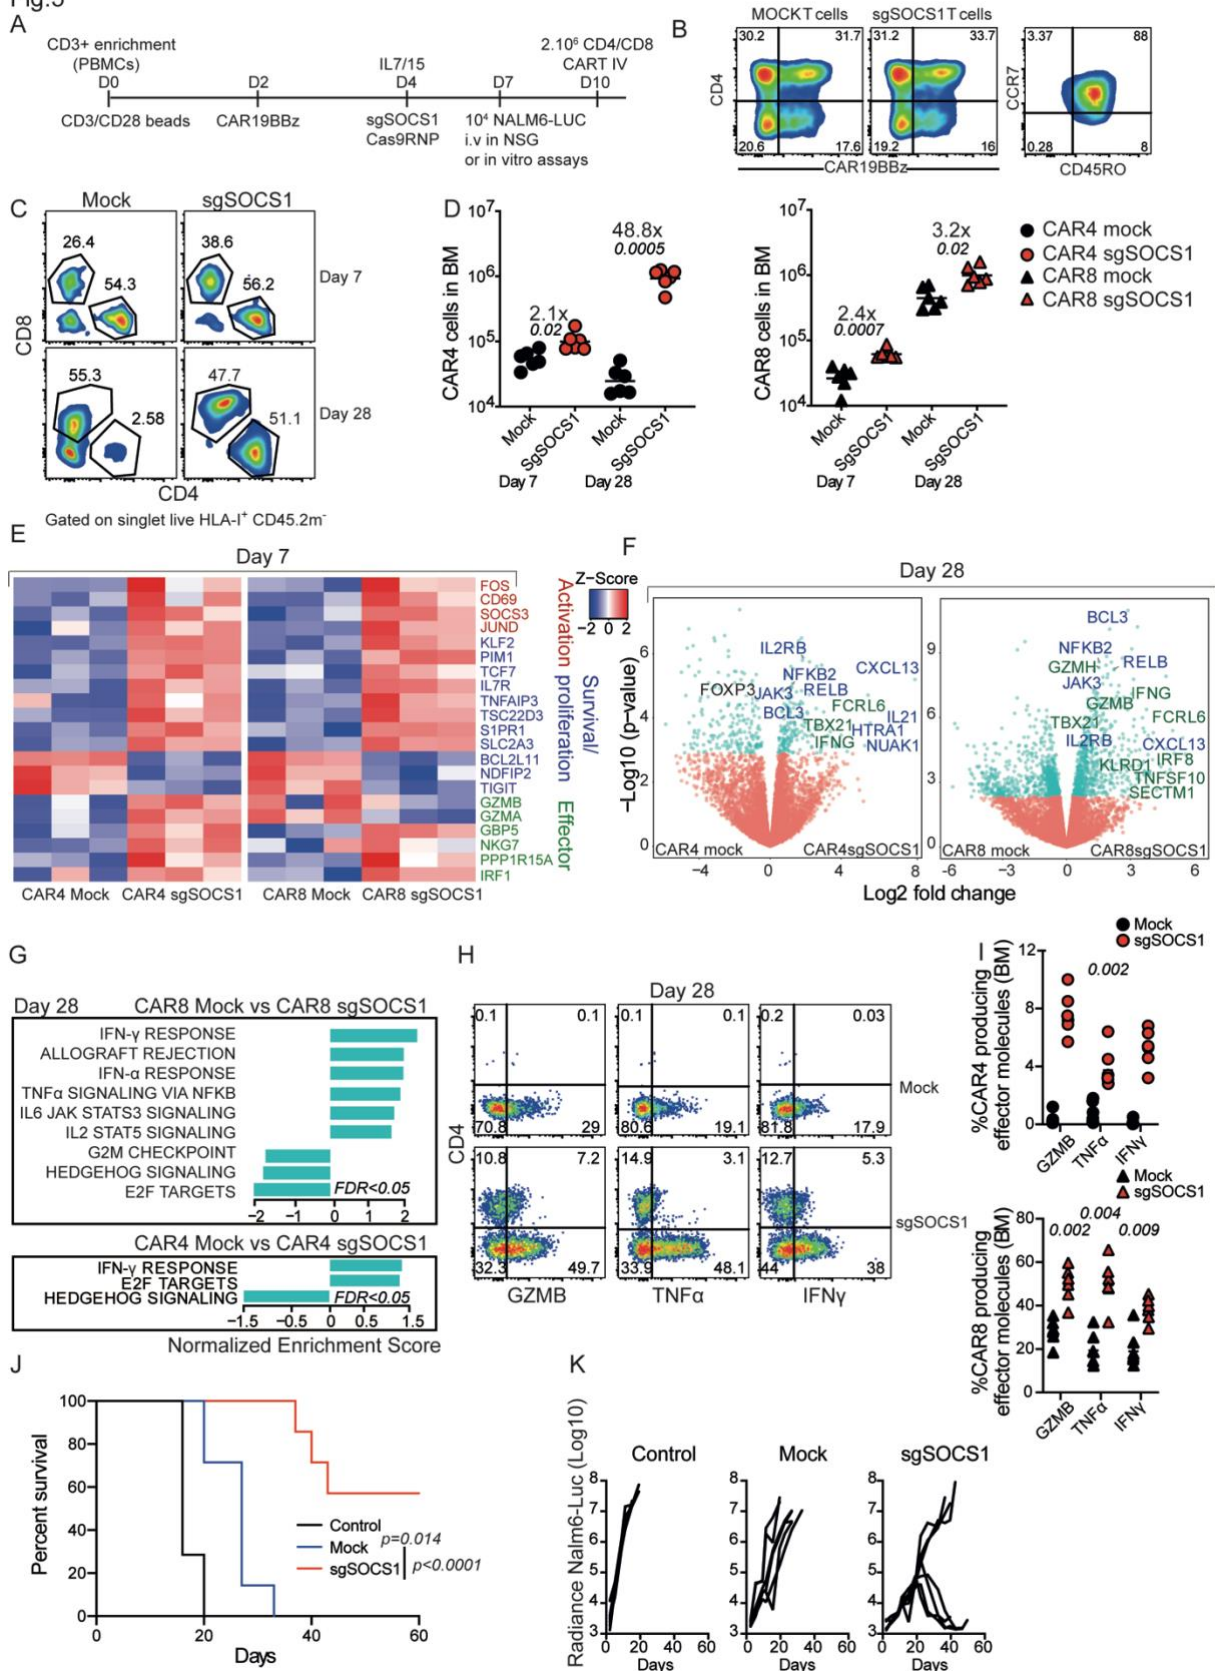

1046  
1047  
1048  
1049

Figure 5
